# Supplementary material for: Effect of Casein Hydrolysate on Cardiovascular Risk Factors: A Systematic Review and Meta-Analysis of Randomized Controlled Trials
Source: MDPI journal article supplement (doi:10.3390/nu14194207), 2022-10-09
Supplement: s1 [file s1]

## Supplementary Materials

### The search terms of casein hydrolysate were used to search:

("casein hydrolysate" [Supplementary Concept]) AND ("blood pressure"[Mesh])

("casein hydrolysate" [Supplementary Concept]) AND ("cholesterol" [Mesh])

("casein hydrolysate" [Supplementary Concept]) AND ("triglycerides" [Mesh])

("casein hydrolysate" [Supplementary Concept]) AND ("blood glucose" [Mesh])

(ALL=(casein hydrolysate)) AND ALL=(blood pressure)

(ALL=(casein hydrolysate)) AND ALL=(cholesterol )

(ALL=(casein hydrolysate)) AND ALL=( triglycerides )

(ALL=(casein hydrolysate)) AND ALL=( blood glucose)

### The references of included RCTs in this article:

- (1) Akazawa, N.; Hamasaki, A.; Tanahashi, K.; Kosaki, K.; Yoshikawa, T.; Myoenzono, K.; Maeda, S. Lactotripeptide Ingestion Increases Cerebral Blood Flow Velocity in Middle-Aged and Older Adults. *Nutr. Res. N. Y. N* 2018, 53, 61–66. <https://doi.org/10.1016/j.nutres.2018.03.009>.
- (2) Cadée, J. A.; Chang, C.-Y.; Chen, C.-W.; Huang, C.-N.; Chen, S.-L.; Wang, C.-K. Bovine Casein Hydrolysate (C12 Peptide) Reduces Blood Pressure in Prehypertensive Subjects. *Am. J. Hypertens.* 2007, 20 (1), 1–5. <https://doi.org/10.1016/j.amjhyper.2006.06.005>.
- (3) Cicero, A. F. G.; Rosticci, M.; Ferroni, A.; Bacchelli, S.; Veronesi, M.; Strocchi, E.; Borghi, C. Predictors of the Short-Term Effect of Isoleucine-Proline-Proline/Valine-Proline-Proline Lactotripeptides from Casein on Office and Ambulatory Blood Pressure in Subjects with Pharmacologically Untreated High-Normal Blood Pressure or First-Degree Hypertension. *Clin. Exp. Hypertens. N. Y. N* 1993 2012, 34 (8), 601–605. <https://doi.org/10.3109/10641963.2012.681731>.
- (4) Engberink, M. F.; Schouten, E. G.; Kok, F. J.; van Mierlo, L. A. J.; Brouwer, I. A.; Geleijnse, J. M. Lactotripeptides Show No Effect on Human Blood Pressure: Results from a Double-Blind Randomized Controlled Trial. *Hypertens. Dallas Tex* 1979 2008, 51 (2), 399–405. <https://doi.org/10.1161/HYPERTENSIONAHA.107.098988>.
- (5) Germino, F. W.; Neutel, J.; Nonaka, M.; Hendler, S. S. The Impact of Lactotripeptides on Blood Pressure Response in Stage 1 and Stage 2 Hypertensives. *J. Clin. Hypertens. Greenwich Conn* 2010, 12 (3), 153–159. <https://doi.org/10.1111/j.1751-7176.2009.00250.x>.

- (6) Igase, M.; Okada, Y.; Igase, K.; Matsumoto, S.; Senzaki, K.; Ochi, M.; Ohyagi, Y.; Yamagishi, S.-I. Casein Hydrolysate Containing Milk-Derived Peptides Reduces Facial Pigmentation Partly by Decreasing Advanced Glycation End Products in the Skin: A Randomized Double-Blind Placebo-Controlled Trial. *Rejuvenation Res.* 2021, 24 (2), 97–103. <https://doi.org/10.1089/rej.2020.2343>.
- (7) Ishida, Y.; Shibata, Y.; Fukuhara, I.; Yano, Y.; Takehara, I.; Kaneko, K. Effect of an Excess Intake of Casein Hydrolysate Containing Val-Pro-Pro and Ile-Pro-Pro in Subjects with Normal Blood Pressure, High-Normal Blood Pressure, or Mild Hypertension. *Biosci. Biotechnol. Biochem.* 2011, 75 (3), 427–433. <https://doi.org/10.1271/bbb.100560>.
- (8) Jauhiainen, T.; Niittynen, L.; Orešič, M.; Järvenpää, S.; Hiltunen, T. P.; Rönnback, M.; Vapaatalo, H.; Korpela, R. Effects of Long-Term Intake of Lactotripeptides on Cardiovascular Risk Factors in Hypertensive Subjects. *Eur. J. Clin. Nutr.* 2012, 66 (7), 843–849. <https://doi.org/10.1038/ejcn.2012.44>.
- (9) Mizuno, S.; Matsuura, K.; Gotou, T.; Nishimura, S.; Kajimoto, O.; Yabune, M.; Kajimoto, Y.; Yamamoto, N. Antihypertensive Effect of Casein Hydrolysate in a Placebo-Controlled Study in Subjects with High-Normal Blood Pressure and Mild Hypertension. *Br. J. Nutr.* 2005, 94 (1), 84–91. <https://doi.org/10.1079/bjn20051422>.
- (10) Nakamura, T.; Mizutani, J.; Ohki, K.; Yamada, K.; Yamamoto, N.; Takeshi, M.; Takazawa, K. Casein Hydrolysate Containing Val-Pro-Pro and Ile-Pro-Pro Improves Central Blood Pressure and Arterial Stiffness in Hypertensive Subjects: A Randomized, Double-Blind, Placebo-Controlled Trial. *Atherosclerosis* 2011, 219 (1), 298–303. <https://doi.org/10.1016/j.atherosclerosis.2011.06.007>.
- (11) Sano, J.; Ohki, K.; Higuchi, T.; Aihara, K.; Mizuno, S.; Kajimoto, O.; Nakagawa, S.; Kajimoto, Y.; Nakamura, Y. Effect of Casein Hydrolysate, Prepared with Protease Derived from *Aspergillus Oryzae*, on Subjects with High-Normal Blood Pressure or Mild Hypertension. *J. Med. Food* 2005, 8 (4), 423–430. <https://doi.org/10.1089/jmf.2005.8.423>.
- (12) Usinger, L.; Jensen, L. T.; Flambard, B.; Linneberg, A.; Ibsen, H. The Antihypertensive Effect of Fermented Milk in Individuals with Prehypertension or Borderline Hypertension. *J. Hum. Hypertens.* 2010, 24 (10), 678–683. <https://doi.org/10.1038/jhh.2010.4>.
- (13) van der Zander, K.; Bots, M. L.; Bak, A. A. A.; Koning, M. M. G.; de Leeuw, P. W. Enzymatically Hydrolyzed Lactotripeptides Do Not Lower Blood Pressure in Mildly Hypertensive Subjects. *Am. J. Clin. Nutr.* 2008, 88 (6), 1697–1702. <https://doi.org/10.3945/ajcn.2008.26003>.
- (14) Yoshizawa, M.; Maeda, S.; Miyaki, A.; Misono, M.; Choi, Y.; Shimojo, N.; Ajisaka, R.; Tanaka, H. Additive Beneficial Effects of Lactotripeptides and Aerobic Exercise on Arterial Compliance in Postmenopausal Women. *Am. J. Physiol. Heart Circ. Physiol.* 2009, 297 (5), H1899–1903. <https://doi.org/10.1152/ajpheart.00433.2009>.
- (15) Yoshizawa, M.; Maeda, S.; Miyaki, A.; Misono, M.; Choi, Y.; Shimojo, N.; Ajisaka, R.; Tanaka, H. Additive Beneficial Effects of Lactotripeptides Intake with Regular Exercise on Endothelium-Dependent Dilatation in Postmenopausal Women. *Am. J. Hypertens.* 2010, 23 (4), 368–372. <https://doi.org/10.1038/ajh.2009.270>.

- (16) Kajimoto, O.; Kurosaki, T.; Mizutani, J.; Ikeda, N.; Kaneko, K.; Aihara, K.; Yabune, M.; Nakamura, Y. Antihypertensive Effects of Liquid Yogurts Containing “Lactotripeptides (VPP, IPP)” in Mild Hypertensive Subjects. *J Nutr Food* 2002, 5.
- (17) Hata, Y.; Yamamoto, M.; Ohni, M.; Nakajima, K.; Nakamura, Y.; Takano, T. A Placebo-Controlled Study of the Effect of Sour Milk on Blood Pressure in Hypertensive Subjects. *Am. J. Clin. Nutr.* 1996, 64 (5), 767–771. <https://doi.org/10.1093/ajcn/64.5.767>.
- (18) Jauhiainen, T.; Vapaatalo, H.; Poussa, T.; Kyrönpalo, S.; Rasmussen, M.; Korpela, R. Lactobacillus Helveticus Fermented Milk Lowers Blood Pressure in Hypertensive Subjects in 24-h Ambulatory Blood Pressure Measurement. *Am. J. Hypertens.* 2005, 18 (12 Pt 1), 1600–1605. <https://doi.org/10.1016/j.amjhyper.2005.06.006>.
- (19) Jauhiainen, T.; Rönneback, M.; Vapaatalo, H.; Wuolle, K.; Kautiainen, H.; Groop, P.-H.; Korpela, R. Long-Term Intervention with Lactobacillus Helveticus Fermented Milk Reduces Augmentation Index in Hypertensive Subjects. *Eur. J. Clin. Nutr.* 2010, 64 (4), 424–431. <https://doi.org/10.1038/ejcn.2010.3>.
- (20) Mizushima, S.; Ohshige, K.; Watanabe, J.; Kimura, M.; Kadowaki, T.; Nakamura, Y.; Tochikubo, O.; Ueshima, H. Randomized Controlled Trial of Sour Milk on Blood Pressure in Borderline Hypertensive Men. *Am. J. Hypertens.* 2004, 17 (8), 701–706. <https://doi.org/10.1016/j.amjhyper.2004.03.674>.
- (21) Seppo, L.; Jauhiainen, T.; Poussa, T.; Korpela, R. A Fermented Milk High in Bioactive Peptides Has a Blood Pressure-Lowering Effect in Hypertensive Subjects. *Am. J. Clin. Nutr.* 2003, 77 (2), 326–330. <https://doi.org/10.1093/ajcn/77.2.326>.
- (22) Lu, T.; Chiu, H.; Lu, Y.; Han, Y.-C.; Shen, Y.; Kamesh, V.; Golovinskaia, O.; Wang, C.-K. Efficacy of Fermented Goat Milk on Blood Pressure in Prehypertensive Adults: A Randomized, Placebo-controlled, Clinical Trial. *J. Food Biochem.* 2017, 42. <https://doi.org/10.1111/jfbc.12474>.
- (23) Cicero, A. F. G.; Colletti, A.; Rosticci, M.; Cagnati, M.; Urso, R.; Giovannini, M.; Borghi, C.; D’Addato, S. Effect of Lactotripeptides (Isoleucine-Proline-Proline/Valine-Proline-Proline) on Blood Pressure and Arterial Stiffness Changes in Subjects with Suboptimal Blood Pressure Control and Metabolic Syndrome: A Double-Blind, Randomized, Crossover Clinical Trial. *Metab. Syndr. Relat. Disord.* 2016, 14 (3), 161–166. <https://doi.org/10.1089/met.2015.0093>.
- (24) Cicero, A. F. G.; Rosticci, M.; Veronesi, M.; Bacchelli, S.; Strocchi, E.; Melegari, C.; Grandi, E.; Borghi, C. Hemodynamic Effects of Lactotripeptides from Casein Hydrolysate in Mediterranean Normotensive Subjects and Patients with High-Normal Blood Pressure: A Randomized, Double-Blind, Crossover Clinical Trial. *J. Med. Food* 2010, 13 (6), 1363–1368. <https://doi.org/10.1089/jmf.2009.0253>.
- (25) Hirota, T.; Ohki, K.; Kawagishi, R.; Kajimoto, Y.; Mizuno, S.; Nakamura, Y.; Kitakaze, M. Casein Hydrolysate Containing the Antihypertensive Tripeptides Val-Pro-Pro and Ile-Pro-Pro Improves Vascular Endothelial Function Independent of Blood Pressure-Lowering Effects: Contribution of the Inhibitory Action of Angiotensin-Converting Enzyme. *Hypertens. Res. Off. J. Jpn. Soc. Hypertens.* 2007, 30 (6), 489–496. <https://doi.org/10.1291/hypres.30.489>.
- (26) Yamasue, K.; Morikawa, N.; Mizushima, S.; Tochikubo, O. The Blood Pressure Lowering Effect of Lactotripeptides and Salt Intake in 24-h Ambulatory Blood Pressure Measurements. *Clin. Exp. Hypertens. N. Y. N* 1993 2010, 32 (4), 214–220. <https://doi.org/10.3109/10641963.2010.491885>.

**Table S1.** Characteristics of the publications included in the meta-analysis.

| Article              | Study design | Source of hydroly-sate | Preparation method | Intervention diet | Control diet | Extracted out-come(s)       | Duration | Health status | Population size n (Ctrl, Inter) | Location | Mean age, y |
|----------------------|--------------|------------------------|--------------------|-------------------|--------------|-----------------------------|----------|---------------|---------------------------------|----------|-------------|
| Akazawa N, 2018      | R, DB        | Milk                   | Fermentation       | LTPs              | Control      | SBP,DBP,TG,T C,FBG          | 8 W      | 1             | 15 (8,7)                        | Japan    | 52-75       |
| Cadée, 2007          | R, DB        | Casein                 | -                  | C12 peptide       | Control      | SBP,DBP                     | 4 W      | 3             | 48 (24,24)                      | China    | >50         |
| Cicero A. F. G, 2012 | R, DB        | Casein                 | -                  | LTPs              | Control      | SBP,DBP                     | 4 W      | 2,4           | 164 (82,82)                     | Italy    | 43.85±11.11 |
| Cicero A. F. G, 2010 | R, SB, C     | Casein                 | Enzyme             | LTPs              | Control      | SBP,DBP                     | 4 W      | 1,2           | 55 (55,55)                      | Italy    | 40.3±9.8    |
| Cicero A. F. G, 2016 | R, DB, C     | Casein                 | Enzyme             | LTPs              | Control      | SBP,DBP                     | 4 W      | 7             | 40 (40,40)                      | Italy    | 40-75       |
| Engberink M. F, 2008 | R, DB        | Casein                 | Fermentation       | LTPs              | Control      | SBP,DBP                     | 8 W      | 2,6           | 67 (32,35)                      | Dutch    | 58.8±9.1    |
| Engberink M. F, 2008 | R, DB        | Casein                 | Enzyme             | LTPs              | Control      | SBP,DBP                     | 8 W      | 2,6           | 64 (32,32)                      | Dutch    | 54.2±8.8    |
| Engberink M. F, 2008 | R, DB        | Casein                 | Synthesis          | LTPs              | Control      | SBP,DBP                     | 8 W      | 2,6           | 68 (32,36)                      | Dutch    | 59.5±8.2    |
| Germino F W, 2010    | R, DB        | -                      | -                  | LTPs              | Control      | SBP                         | 6 W      | 4,5           | 81 (29,52)                      | America  | 32–78       |
| Hirota T, 2007       | R, DB, C     | Casein                 | Enzyme             | LTPs              | Control      | SBP,DBP,TG,T C, FBG         | 1 W      | 4             | 24 (24,24)                      | Japan    | 54.1±8.1    |
| Igase M, 2021        | R, DB        | Casein                 | -                  | LTPs              | Control      | SBP,DBP,TG,L DL,HDL         | 48 W     | 1             | 80 (44,36)                      | Japan    | 71.7±9.2    |
| Ishida Y, 2011       | R, DB        | Casein                 | Enzyme             | LTPs              | Control      | SBP,DBP,TG,T C, FBG         | 4 W      | 1,2,4         | 48 (24,24)                      | Japan    | 49.3±11.9   |
| Jauhiainen T, 2012   | R, DB        | -                      | -                  | Peptide           | Control      | SBP,DBP                     | 3 M      | 4             | 89 (44,45)                      | Finland  | 49±5        |
| Mizuno S, 2005       | R, SB        | Casein                 | Enzyme             | IPP, VPP          | Control      | SBP,DBP,TG,T C,HDL, FBG     | 6 W      | 4             | 41 (20, 21)                     | Japan    | 46±14.7     |
| Mizuno S, 2005       | R, SB        | Casein                 | Enzyme             | IPP, VPP          | Control      | SBP,DBP,TG,T C,HDL, FBG     | 6 W      | 2             | 24 (12, 12)                     | Japan    | 42.6±12.1   |
| Nakamura T, 2011     | R, DB        | -                      | -                  | LTPs              | Control      | SBP,DBP,TG,T C,LDL,HDL, FBG | 8 W      | 6             | 90 (45,45)                      | Japan    | 50-69       |

|                       |          |        |              |           |         |                            |      |     |              |         |          |
|-----------------------|----------|--------|--------------|-----------|---------|----------------------------|------|-----|--------------|---------|----------|
| Sano J, 2005          | R, DB    | Casein | Enzyme       | LTPs      | Control | SBP,DBP,TC,H<br>DL, FBG    | 12 W | 2,4 | 144 (72,72)  | Japan   | 51±10    |
| Usinger L, 2010       | R, DB    | -      | Fermentation | LTPs      | Control | TG,TC,LDL,HD<br>L          | 8 W  | 3,6 | 48 (15,32)   | Denmark | 54±11    |
| Van D, 2008           | R, DB    | Casein | Enzyme       | ELTP      | Control | SBP,DBP                    | 8 W  | 4   | 271(137,134) | Dutch   | 60±7     |
| Yamasue K,<br>2010    | R, DB, C | -      | Fermentation | LTPs      | Control | SBP,DBP                    | 8 W  | 2   | 22 (22,22)   | Japan   | 63.3±4.6 |
| Yoshizawa M,<br>2010  | R        | -      | Fermentation | LTPs      | Control | SBP,DBP,TG,T<br>C,LDL,HDL  | 8 W  | 1   | 22 (10,12)   | Japan   | 58±1     |
| Yoshizawa M,<br>2009  | R        | Casein | Fermentation | LTPs      | Control | SBP,DBP,TG,T<br>C,LDL,HDL  | 8 W  | 1   | 28 (13,15)   | Japan   | 59±1     |
| Kajimoto O,<br>2002   | R, DB    | Milk   | Fermentation | LTPs      | Control | SBP,DBP,TG,T<br>C, HDL     | 8 W  | 4   | 64 (33,31)   | Japan   | 50±11    |
| Hata Y, 1996          | R        | Milk   | Fermentation | Sour milk | Control | SBP,DBP,TG,T<br>C,HDL, FBG | 8 W  | 6   | 30 (13,17)   | Japan   | 40-86    |
| Jauhiainen T,<br>2005 | R, DB    | Milk   | Fermentation | Sour milk | Control | SBP,DBP,TG,L<br>DL         | 10 W | 6   | 94 (47,47)   | Finland | 55±11    |
| Jauhiainen T,<br>2010 | R, DB    | Milk   | Fermentation | Peptide   | Control | SBP,DBP                    | 24 W | 6   | 89 (45,44)   | Finland | 49±5     |
| Mizushima S,<br>2004  | R, DB    | Milk   | Fermentation | Sour milk | Control | SBP,DBP,TG,T<br>C,HDL      | 4 W  | 6   | 46 (23,23)   | Japan   | 48.5±8.9 |
| Seppo L, 2002         | R, DB    | Milk   | Fermentation | LTPs      | Control | SBP,DBP                    | 21 W | 6   | 36 (17,19)   | Finland | 47.9±6.9 |
| Lu T M, 2018          | R, DB    | Milk   | Fermentation | LTPs      | Control | TG,TC,LDL,HD<br>L          | 8 W  | 3   | 45 (23,22)   | China   | 30-65    |

Data are presented as mean ± sd or as a range.

Study design: R, randomized; DB, double-blinded; SB, single-blinded; C, crossover design.

Intervention diet: LTPs, lactotripeptides; IPP, Isoleucine-Proline-Proline; VPP, Valine-Proline-Proline.

Extracted outcome(s): SBP, systolic blood pressure; DBP, diastolic blood pressure; TG, triglyceride; TC, total cholesterol; HDL-C, high density lipoprotein cholesterol; LDL-C, low density lipoprotein-cholesterol; FBG, fasting blood pressure.

Duration: W, week; M, month.

Health status: 1, health; 2, high-normal blood pressure; 3, prehypertension; 4, Stage I hypertension (mild hypertension); 5, Stage II hypertension (moderate hypertension); 6, hypertension; 7, metabolic syndrome.

Population size: Ctrl, control group; Inter, intervention group.

-, not reported.

**Table S2.** P value of Egger's test analyses on SBP, DBP, TC, LDL, HDL, TG, and FBG from included RCTs articles.

|     | <i>P</i> Egger's test |
|-----|-----------------------|
| SBP | 0.01                  |
| DBP | 0.03                  |
| TC  | 0.304                 |
| LDL | 0.483                 |
| HDL | 0.396                 |
| TG  | 0.473                 |
| FBG | 0.430                 |

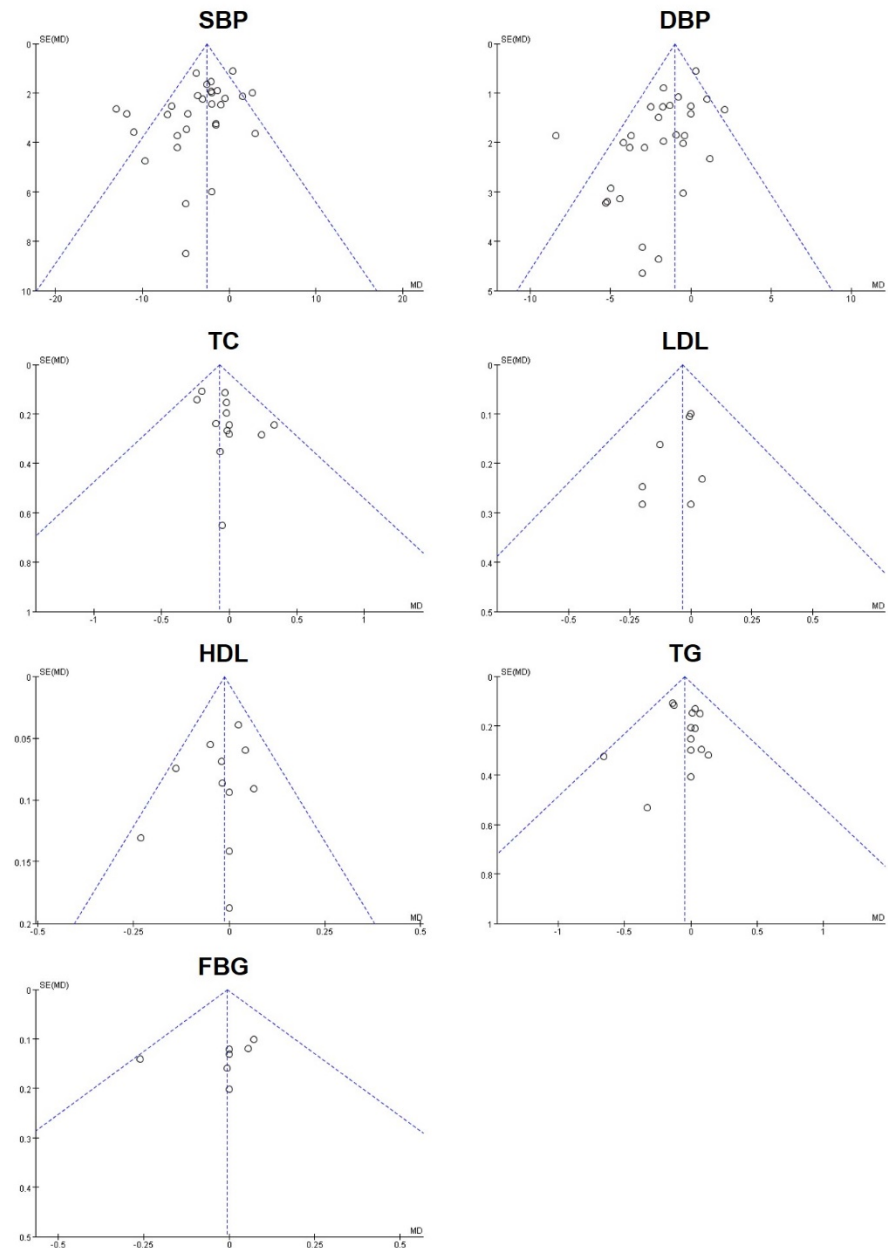

**Figure S1.** Funnel plots on SBP, DBP, TC, LDL, HDL, TG, FBG in the overall effect analysis.

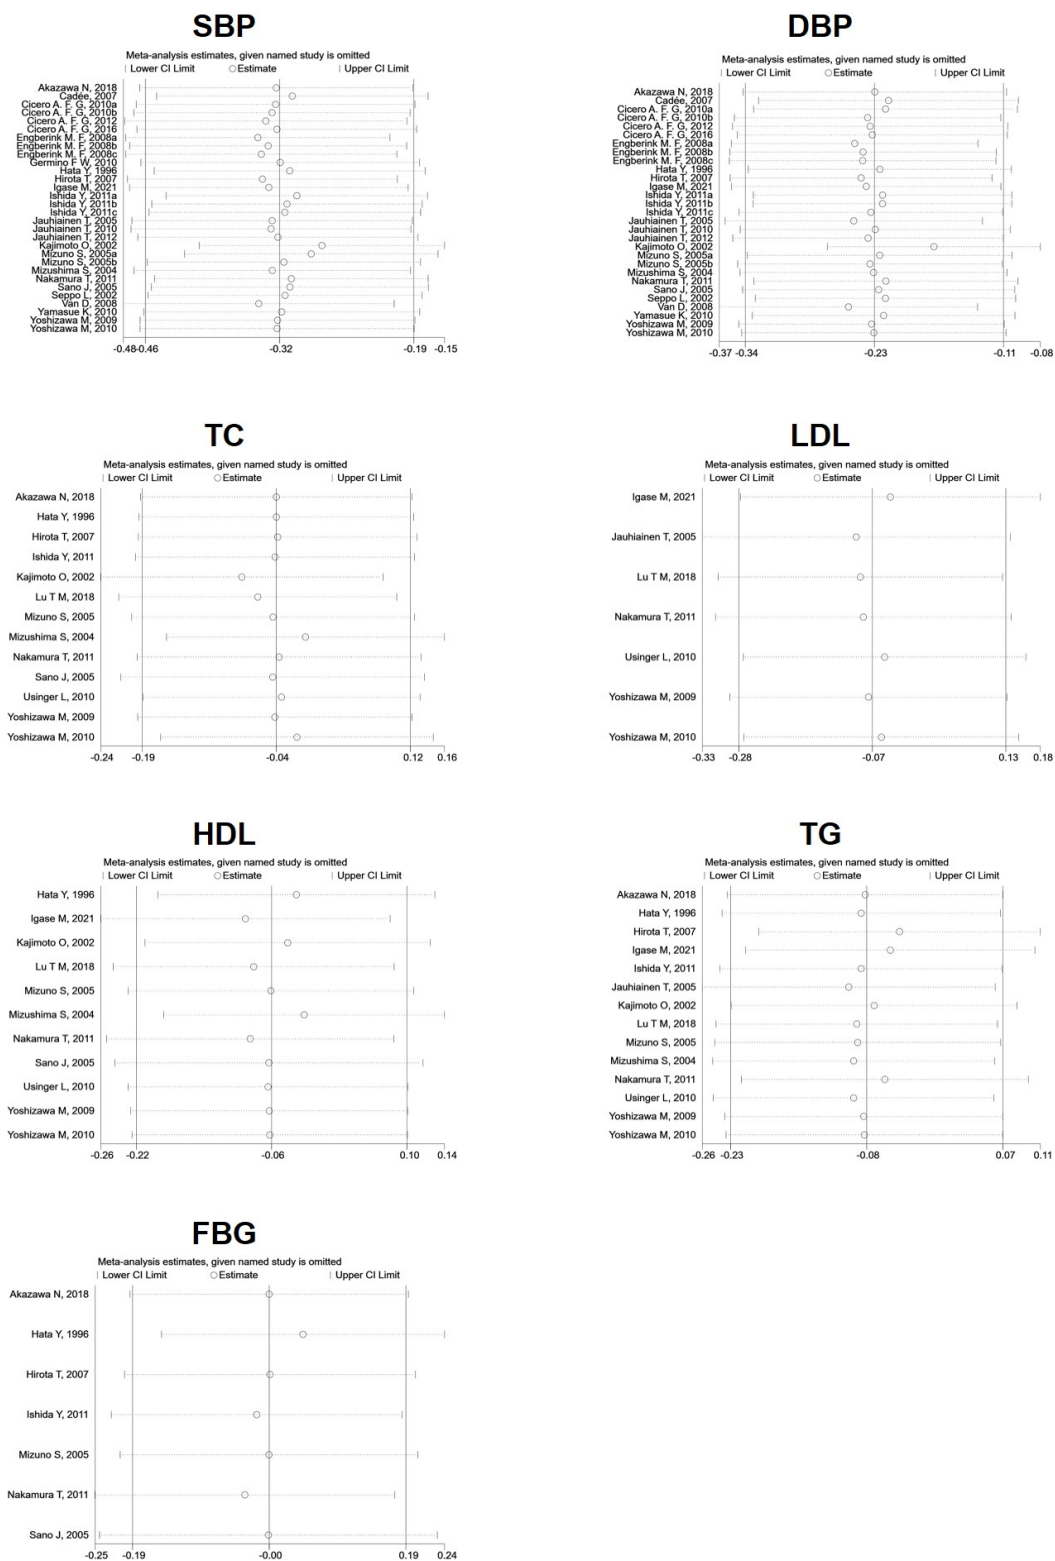

**Figure S2.** Sensitivity analysis on SBP, DBP, TC, LDL, HDL, TG, FBG in the overall effect analysis.

# A

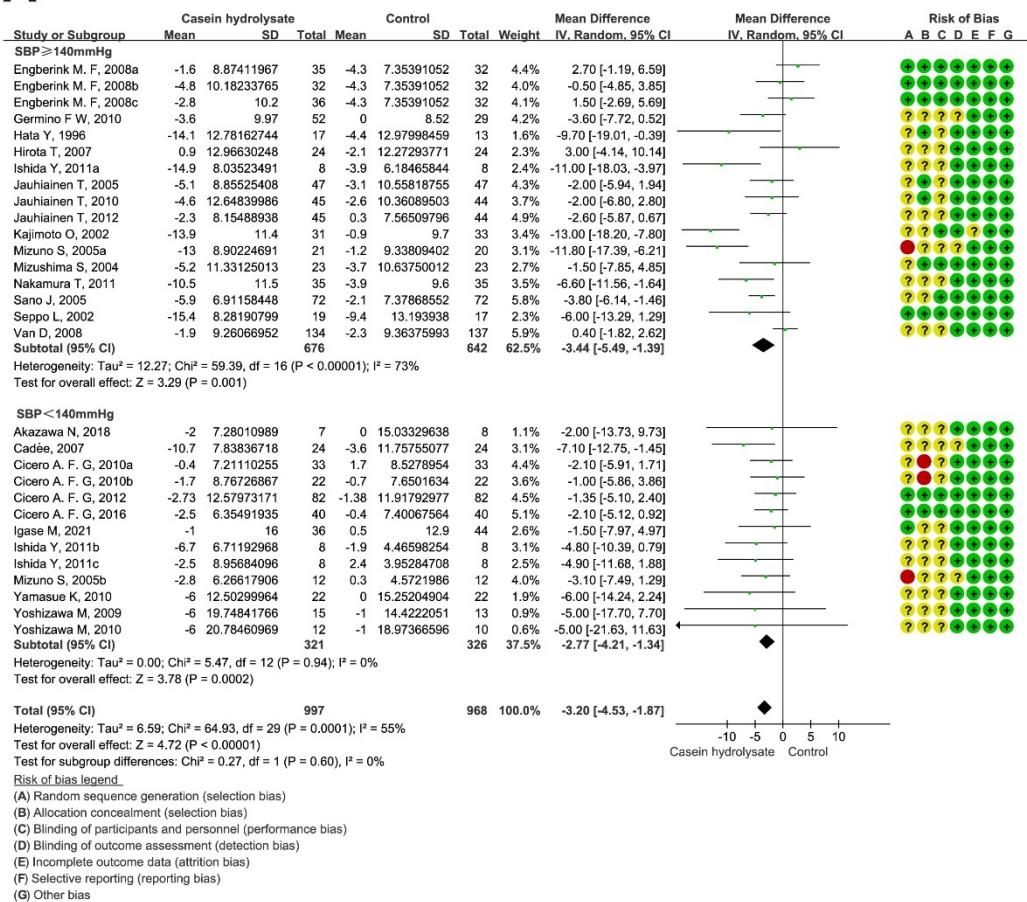

# B

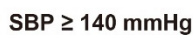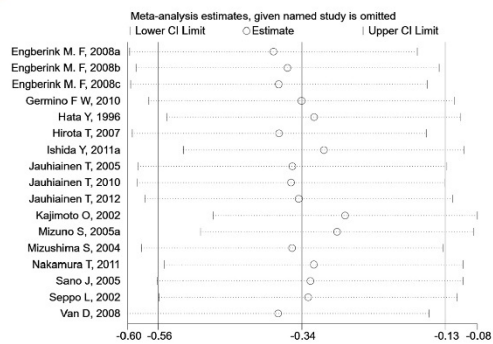

**SBP < 140mmHg**

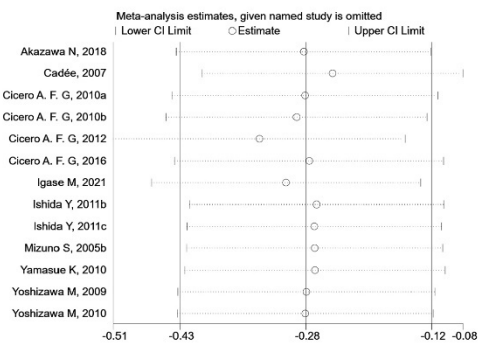

**C**

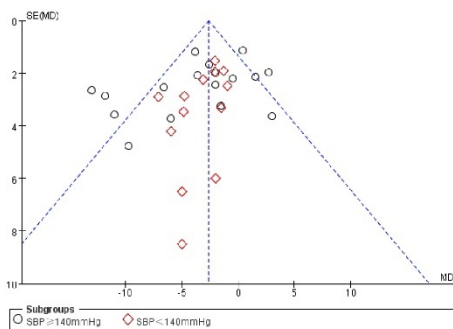

**Figure S3.** Forest plots (A), sensitivity analysis (B), and funnel plots (C) on SBP (mmHg) in baseline SBP analysis. The results represented the changes of SBP in baseline SBP subgroup with the casein hydrolysate intervention in comparison with the control diet.

## A Age

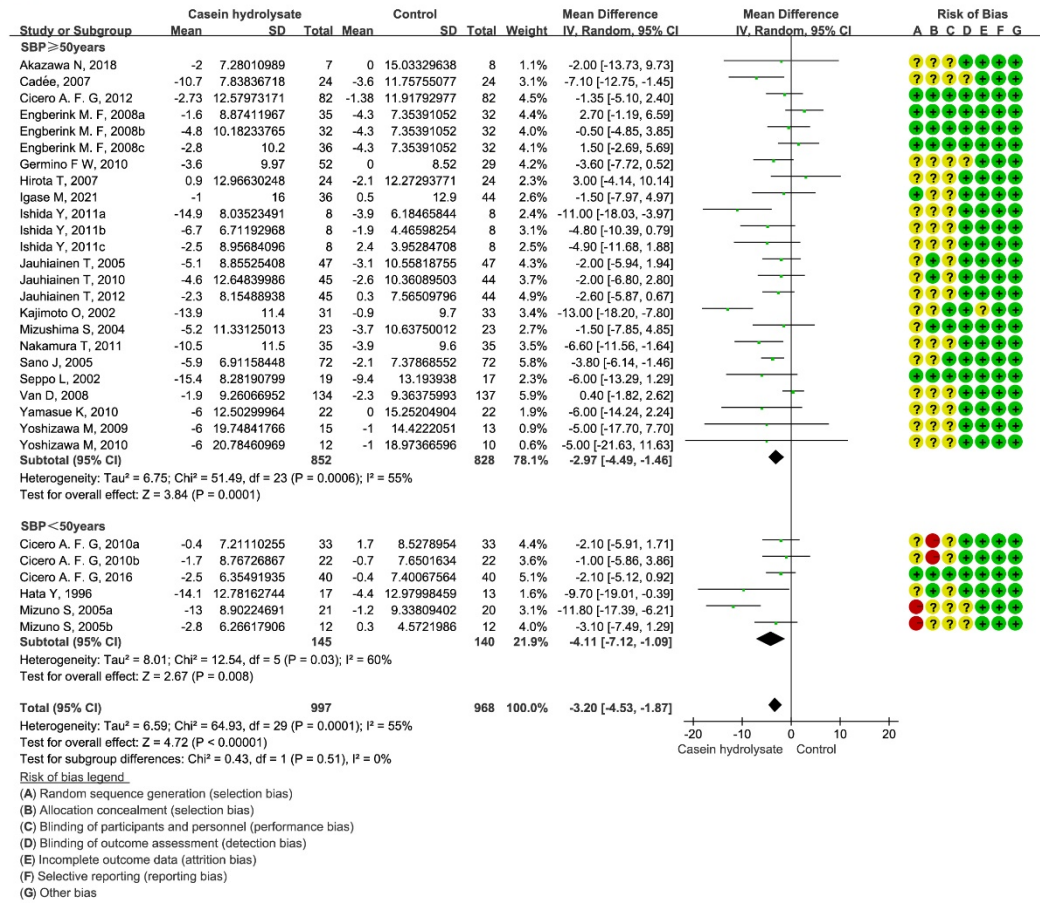

## B

### SBP ≥ 50 years

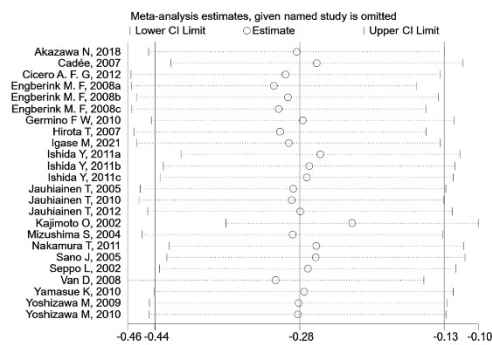

### SBP < 50 years

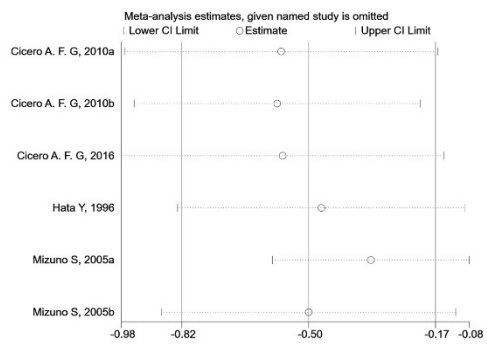

## C

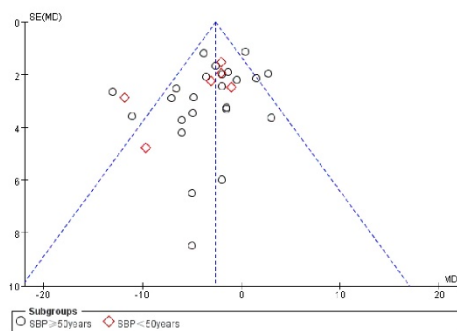

**Figure S4.** Forest plots (A), sensitivity analysis (B), and funnel plots (C) on SBP (mmHg) in the age analysis. The results represented the changes of SBP in the age subgroup with the casein hydrolysate intervention in comparison with the control diet.

## A Duration

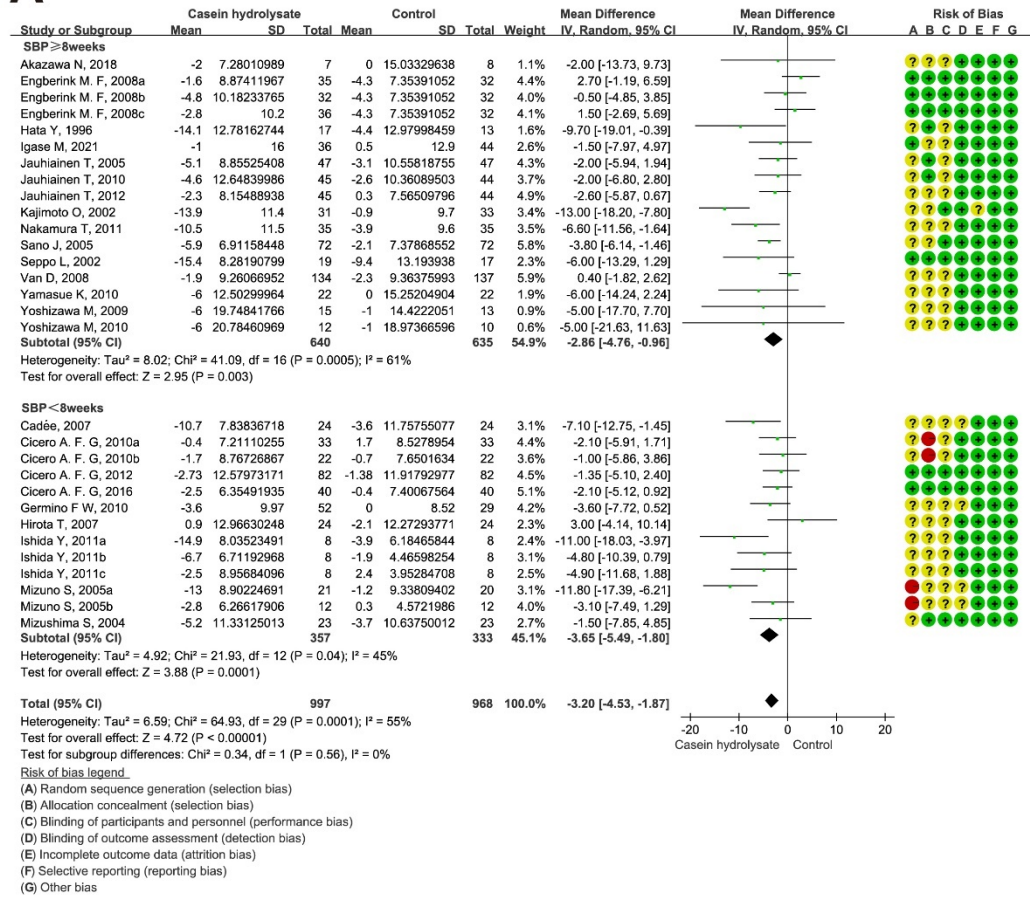

## B

### SBP ≥ 8 weeks

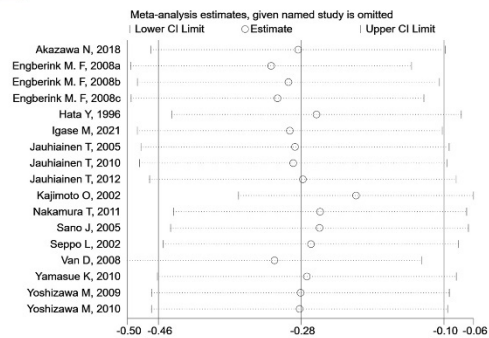

### SBP < 8 weeks

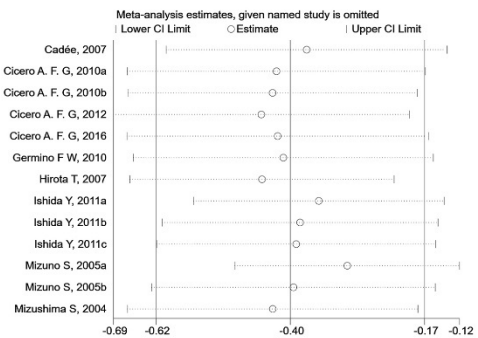

## C

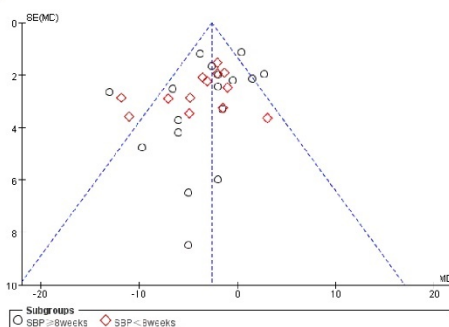

**Figure S5.** Forest plots (A), sensitivity analysis (B), and funnel plots (C) on SBP (mmHg) in the duration analysis. The results represented the changes of SBP in the duration subgroup with the casein hydrolysate intervention in comparison with the control diet.

## A Preparation

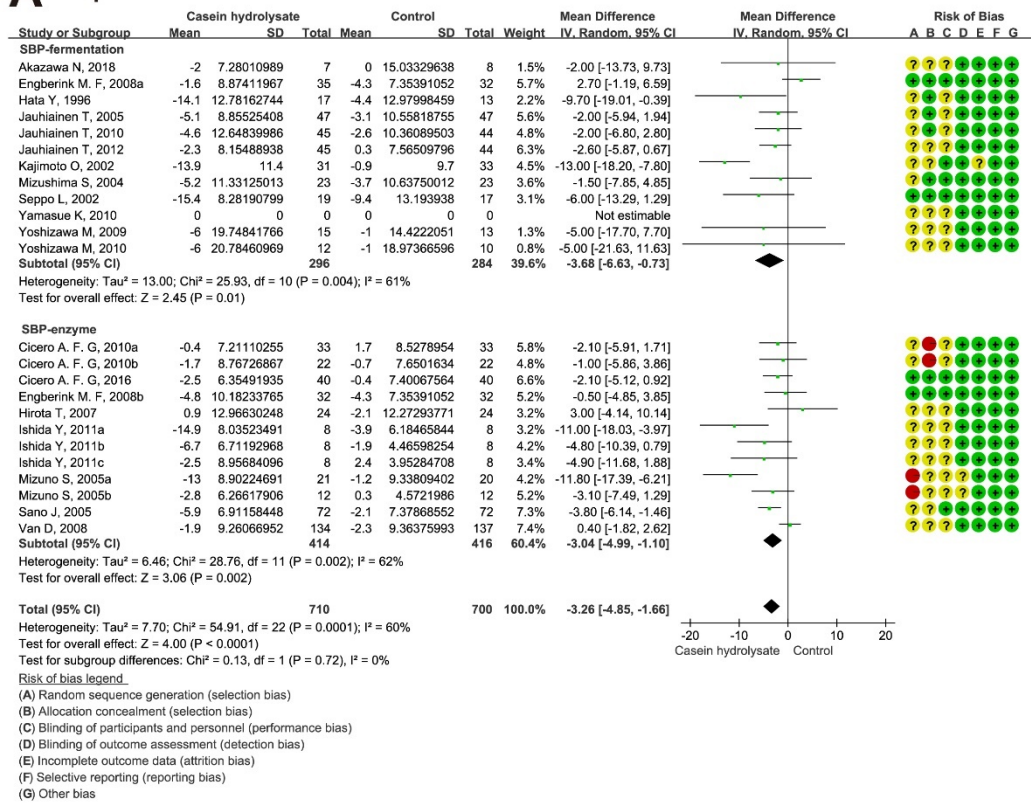

## B

### Fermentation

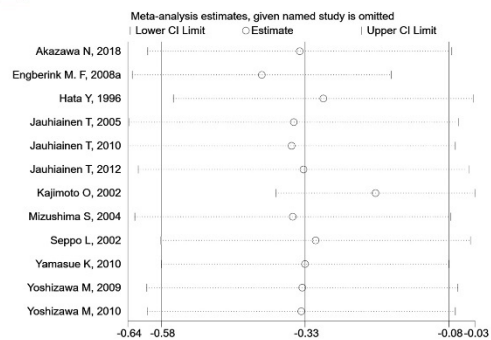

### Enzyme

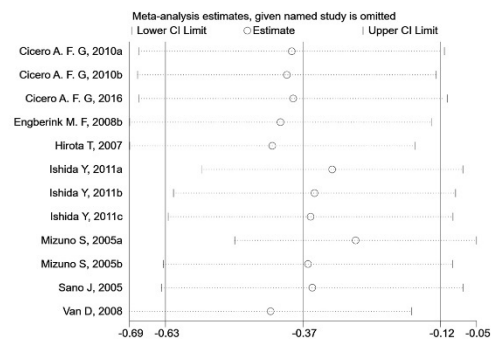

## C

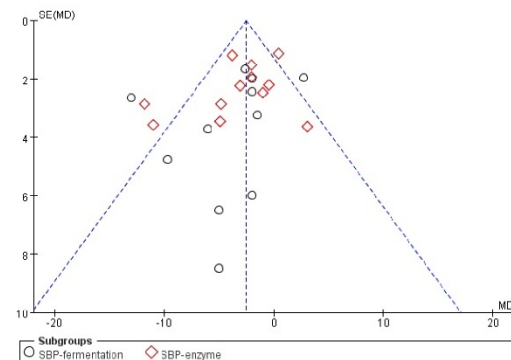

**Figure S6.** Forest plots (A), sensitivity analysis (B), and funnel plots (C) on SBP (mmHg) in the preparation analysis. The results represented the changes of SBP in the preparation subgroup with the casein hydrolysate intervention in comparison with the control diet.

## A Disease

| Study or Subgroup                                                                                             | Casein hydrolysate |             |       | Control |             |       | Mean Difference |                        | Mean Difference    |   | Risk of Bias |   |   |   |   |   |  |
|---------------------------------------------------------------------------------------------------------------|--------------------|-------------|-------|---------|-------------|-------|-----------------|------------------------|--------------------|---|--------------|---|---|---|---|---|--|
|                                                                                                               | Mean               | SD          | Total | Mean    | SD          | Total | Weight          | IV, Random, 95% CI     | IV, Random, 95% CI | A | B            | C | D | E | F | G |  |
| <b>SBP- BP disease</b>                                                                                        |                    |             |       |         |             |       |                 |                        |                    |   |              |   |   |   |   |   |  |
| Cicero A. F. G. 2012                                                                                          | -2.73              | 12.57973171 | 82    | -1.38   | 11.91792977 | 82    | 4.5%            | -1.35 [-5.10, 2.40]    |                    |   |              |   |   |   |   |   |  |
| Cicero A. F. G. 2016                                                                                          | -2.5               | 6.35491935  | 40    | -0.4    | 7.40067564  | 40    | 5.1%            | -2.10 [-5.12, 0.92]    |                    |   |              |   |   |   |   |   |  |
| Engberink M. F. 2008a                                                                                         | -1.6               | 8.87411987  | 35    | -4.3    | 7.35391052  | 32    | 4.4%            | 2.70 [-1.19, 6.59]     |                    |   |              |   |   |   |   |   |  |
| Engberink M. F. 2008b                                                                                         | -4.8               | 10.18233765 | 32    | -4.3    | 7.35391052  | 32    | 4.0%            | -0.50 [-4.85, 3.85]    |                    |   |              |   |   |   |   |   |  |
| Engberink M. F. 2008c                                                                                         | -2.8               | 10.2        | 36    | -4.3    | 7.35391052  | 32    | 4.1%            | 1.50 [-2.69, 5.69]     |                    |   |              |   |   |   |   |   |  |
| Germirino F W, 2010                                                                                           | -3.6               | 9.97        | 52    | 0       | 8.84        | 29    | 4.2%            | -3.60 [-7.72, 0.52]    |                    |   |              |   |   |   |   |   |  |
| Hata Y, 1996                                                                                                  | -14.1              | 12.78162744 | 17    | -4.4    | 12.97989459 | 13    | 1.6%            | -9.70 [-19.01, -0.39]  |                    |   |              |   |   |   |   |   |  |
| Hirota T, 2007                                                                                                | 0.9                | 12.96630248 | 24    | -1.1    | 12.27293771 | 24    | 2.3%            | 3.00 [-4.14, 10.14]    |                    |   |              |   |   |   |   |   |  |
| Ishida Y, 2011a                                                                                               | -14.9              | 8.03523491  | 8     | -3.9    | 6.18465844  | 8     | 2.4%            | -11.00 [-18.03, -3.97] |                    |   |              |   |   |   |   |   |  |
| Ishida Y, 2011b                                                                                               | -6.7               | 6.71192968  | 8     | -1.9    | 4.46598254  | 8     | 3.1%            | -4.80 [-10.39, 0.79]   |                    |   |              |   |   |   |   |   |  |
| Jauhiainen T, 2005                                                                                            | -5.1               | 8.85525408  | 47    | -3.1    | 10.55818755 | 47    | 4.3%            | -2.00 [-5.94, 1.94]    |                    |   |              |   |   |   |   |   |  |
| Jauhiainen T, 2010                                                                                            | -4.6               | 12.64839986 | 45    | -2.6    | 10.36088903 | 44    | 3.7%            | -2.00 [-6.80, 2.80]    |                    |   |              |   |   |   |   |   |  |
| Jauhiainen T, 2012                                                                                            | -2.3               | 8.15488938  | 45    | 0.3     | 7.56509796  | 44    | 4.9%            | -2.60 [-5.87, 0.67]    |                    |   |              |   |   |   |   |   |  |
| Kajimoto O, 2002                                                                                              | -13.9              | 11.4        | 31    | -0.9    | 9.7         | 33    | 3.4%            | -13.00 [-18.20, -7.80] |                    |   |              |   |   |   |   |   |  |
| Mizuno S, 2005a                                                                                               | -13                | 8.90224691  | 21    | -1.2    | 9.33809402  | 20    | 3.1%            | -11.80 [-17.39, -6.21] |                    |   |              |   |   |   |   |   |  |
| Mizushima S, 2004                                                                                             | -5.2               | 11.33125013 | 23    | -3.7    | 10.63750012 | 23    | 2.7%            | -1.50 [-7.85, 4.85]    |                    |   |              |   |   |   |   |   |  |
| Nakamura T, 2011                                                                                              | -10.5              | 11.5        | 35    | -3.9    | 9.6         | 35    | 3.5%            | -6.60 [-11.56, -1.64]  |                    |   |              |   |   |   |   |   |  |
| Sano J, 2005                                                                                                  | -5.9               | 6.91158448  | 72    | -2.1    | 7.37868552  | 72    | 5.8%            | -3.80 [-6.14, -1.46]   |                    |   |              |   |   |   |   |   |  |
| Seppo L, 2002                                                                                                 | -15.4              | 8.28190799  | 19    | -9.4    | 13.193938   | 17    | 2.3%            | -6.00 [-13.29, 1.29]   |                    |   |              |   |   |   |   |   |  |
| Van D, 2008                                                                                                   | -1.9               | 9.26066952  | 134   | -2.3    | 9.36375993  | 137   | 5.9%            | 0.40 [-1.82, 2.62]     |                    |   |              |   |   |   |   |   |  |
| Subtotal (95% CI)                                                                                             |                    |             | 806   |         |             | 772   | 75.2%           | -3.23 [-4.95, -1.51]   |                    |   |              |   |   |   |   |   |  |
| Heterogeneity: Tau <sup>2</sup> = 9.49; Chi <sup>2</sup> = 60.47, df = 19 (P < 0.00001); I <sup>2</sup> = 69% |                    |             |       |         |             |       |                 |                        |                    |   |              |   |   |   |   |   |  |
| Test for overall effect: Z = 3.69 (P = 0.0002)                                                                |                    |             |       |         |             |       |                 |                        |                    |   |              |   |   |   |   |   |  |
| <b>SBP- healthy</b>                                                                                           |                    |             |       |         |             |       |                 |                        |                    |   |              |   |   |   |   |   |  |
| Akazawa N, 2018                                                                                               | -2                 | 7.28010989  | 7     | 0       | 15.03329638 | 8     | 1.1%            | -2.00 [-13.73, 9.73]   |                    |   |              |   |   |   |   |   |  |
| Cadee, 2007                                                                                                   | -10.7              | 7.83836718  | 24    | -3.6    | 11.75755077 | 24    | 3.1%            | -7.10 [-12.75, -1.45]  |                    |   |              |   |   |   |   |   |  |
| Cicero A. F. G. 2010a                                                                                         | -0.4               | 7.21110255  | 33    | 1.7     | 8.5278954   | 33    | 4.4%            | -2.10 [-5.91, 1.71]    |                    |   |              |   |   |   |   |   |  |
| Cicero A. F. G. 2010b                                                                                         | -1.7               | 8.76726867  | 22    | -0.7    | 7.6501634   | 22    | 3.6%            | -1.00 [-5.86, 3.86]    |                    |   |              |   |   |   |   |   |  |
| Igase M, 2021                                                                                                 | -1                 | 16          | 36    | 0.5     | 12.9        | 44    | 2.6%            | -1.50 [-7.97, 4.97]    |                    |   |              |   |   |   |   |   |  |
| Ishida Y, 2011c                                                                                               | -2.5               | 8.95684906  | 8     | 2.4     | 3.95284708  | 8     | 2.5%            | -4.90 [-11.68, 1.88]   |                    |   |              |   |   |   |   |   |  |
| Mizuno S, 2005b                                                                                               | -2.8               | 6.26617096  | 12    | 0.3     | 4.5721986   | 12    | 4.0%            | -3.10 [-7.49, 1.29]    |                    |   |              |   |   |   |   |   |  |
| Yamasue K, 2010                                                                                               | -6                 | 12.50299964 | 22    | 0       | 15.25204904 | 22    | 1.9%            | -6.00 [-14.24, 2.24]   |                    |   |              |   |   |   |   |   |  |
| Yoshizawa M, 2009                                                                                             | -6                 | 19.74841766 | 15    | -1      | 14.422251   | 13    | 0.9%            | -5.00 [-17.70, 7.70]   |                    |   |              |   |   |   |   |   |  |
| Yoshizawa M, 2010                                                                                             | -6                 | 20.78460969 | 12    | -1      | 18.97366596 | 10    | 0.6%            | -5.00 [-21.63, 11.63]  |                    |   |              |   |   |   |   |   |  |
| Subtotal (95% CI)                                                                                             |                    |             | 191   |         |             | 196   | 24.8%           | -3.18 [-5.10, -1.26]   |                    |   |              |   |   |   |   |   |  |
| Heterogeneity: Tau <sup>2</sup> = 0.00; Chi <sup>2</sup> = 4.05, df = 9 (P = 0.91); I <sup>2</sup> = 0%       |                    |             |       |         |             |       |                 |                        |                    |   |              |   |   |   |   |   |  |
| Test for overall effect: Z = 3.25 (P = 0.001)                                                                 |                    |             |       |         |             |       |                 |                        |                    |   |              |   |   |   |   |   |  |

Total (95% CI) 997  
Heterogeneity:  $\tau^2 = 6.59$ ;  $\chi^2 = 64.93$ ,  $df = 29$  ( $P = 0.0001$ );  $I^2 = 55\%$   
Test for overall effect:  $Z = 4.72$  ( $P < 0.00001$ )  
Test for subgroup differences:  $\chi^2 = 0.00$ ,  $df = 1$  ( $P = 0.97$ ),  $I^2 = 0\%$

Risk of bias legend

(A) Random sequence generation (selection bias)

(B) Allocation concealment (selection bias)

(C) Blinding of participants and personnel (performance bias)

(D) Blinding of outcome assessment (detection bias)

(E) Incomplete outcome data (attrition bias)

(F) Selective reporting (reporting bias)

(G) Other bias

# B

**BP disease**

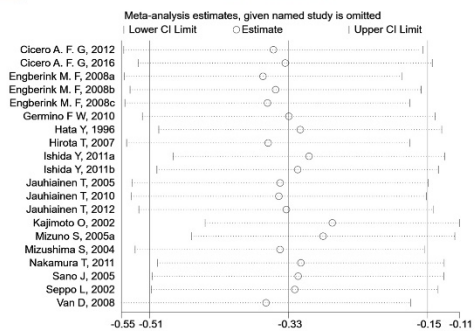

## Healthy

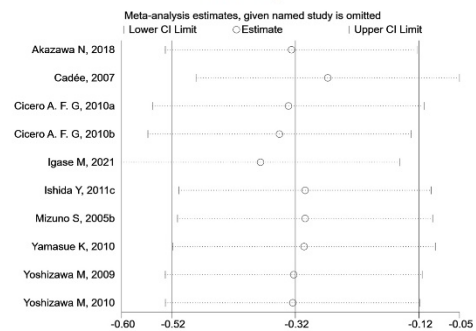

**C**

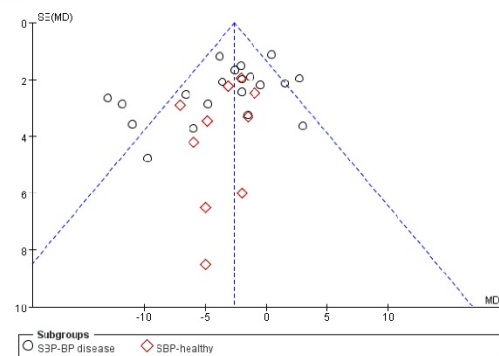

**Figure S7.** Forest plots (A), sensitivity analysis (B), and funnel plots (C) on SBP (mmHg) in the disease analysis. The results represented the changes of SBP in the disease subgroup with the casein hydrolysate intervention in comparison with the control diet.

## A Baseline DBP

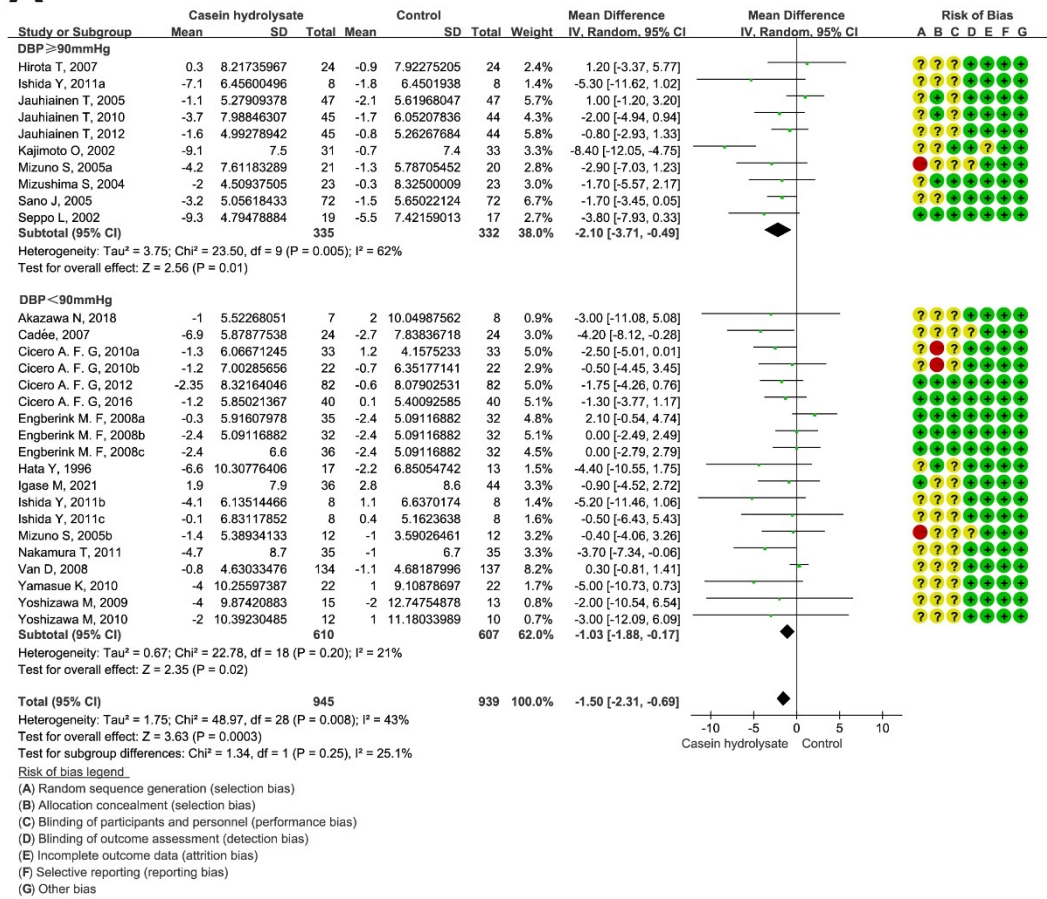

## B

DBP ≥ 90 mmHg

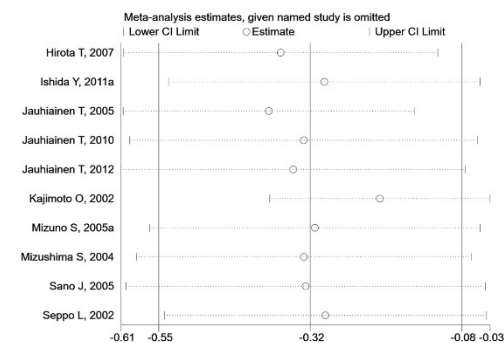

DBP < 90 mmHg

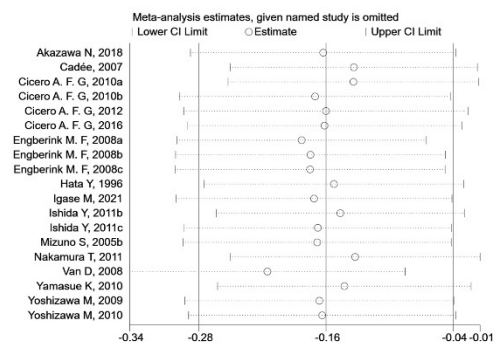

## C

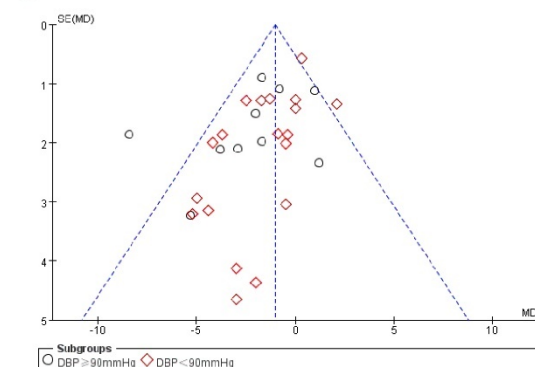

**Figure S8.** Forest plots (A), sensitivity analyses (B), and funnel plots (C) on DBP (mmHg) in baseline DBP analysis. The results represented the changes of DBP in baseline DBP subgroup with the casein hydrolysate intervention in comparison with the control diet.

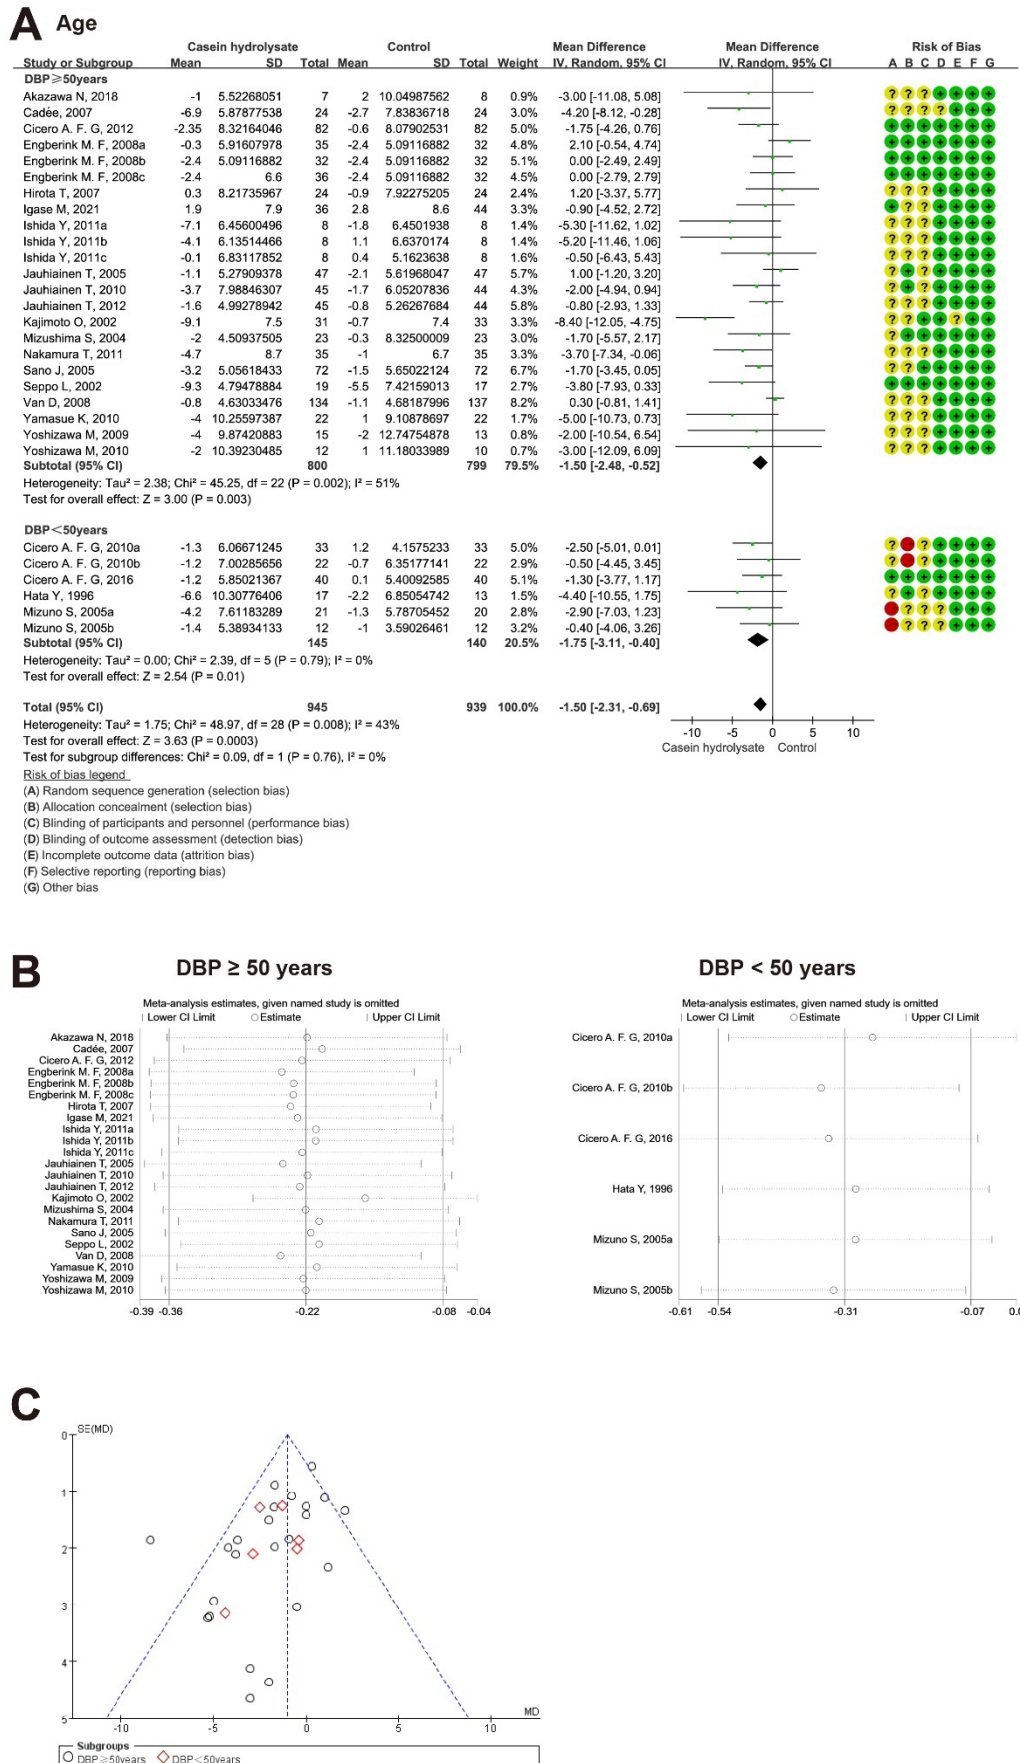

**Figure S9.** Forest plots (A), sensitivity analyses (B), and funnel plots (C) on DBP (mmHg) in the age analysis. The results represented the changes of DBP in the age subgroup with the casein hydrolysate intervention in comparison with the control diet.

## A Duration

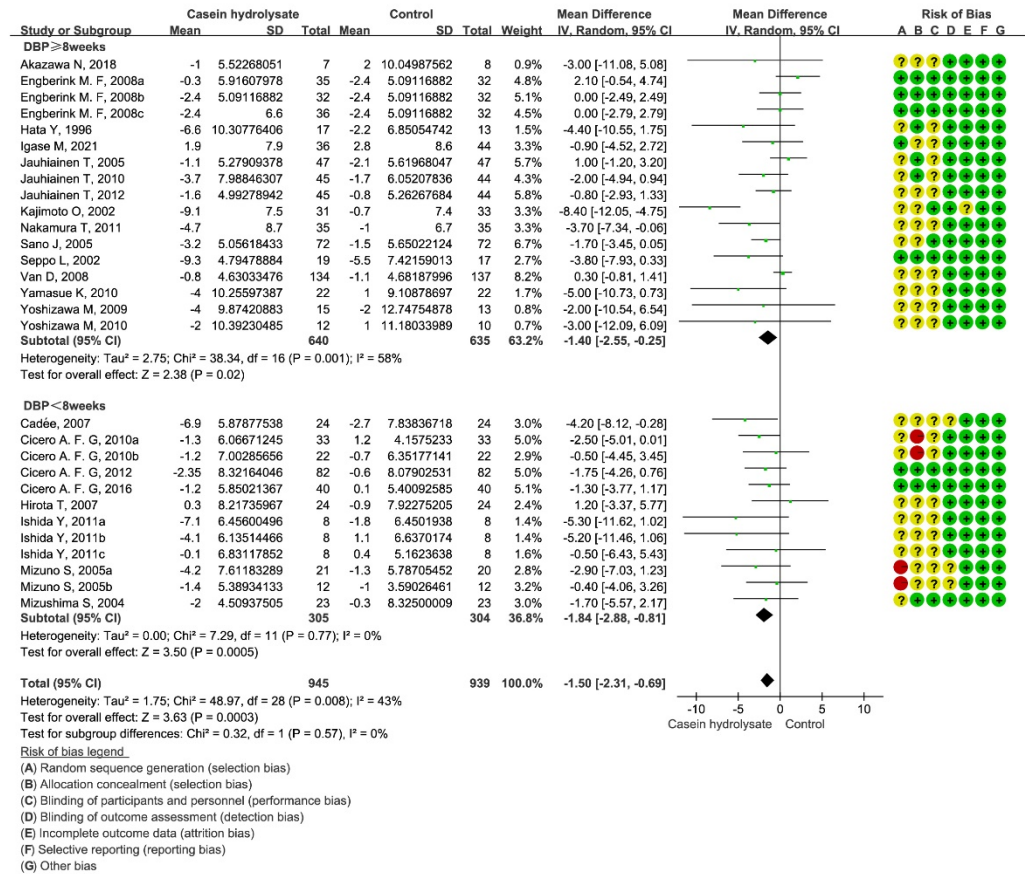

## B

### DBP ≥ 8 weeks

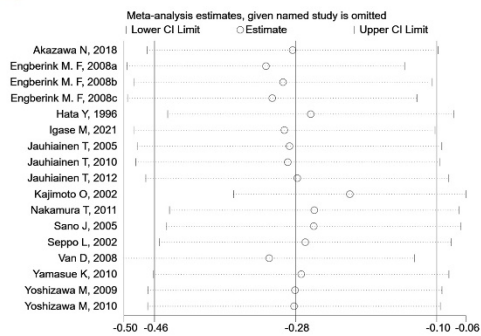

### DBP < 8 weeks

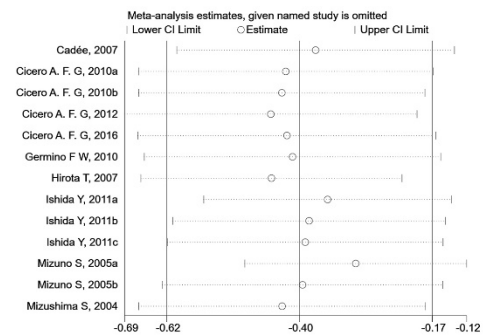

## C

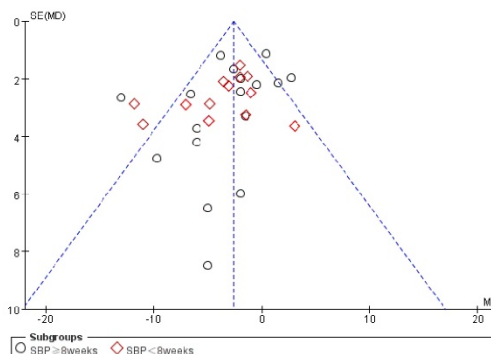

**Figure S10.** Forest plots (A), sensitivity analyses (B), and funnel plots (C) on DBP (mmHg) in the duration analysis. The results represented the changes of DBP in the duration subgroup with the casein hydrolysate intervention in comparison with the control diet.

## A Preparation

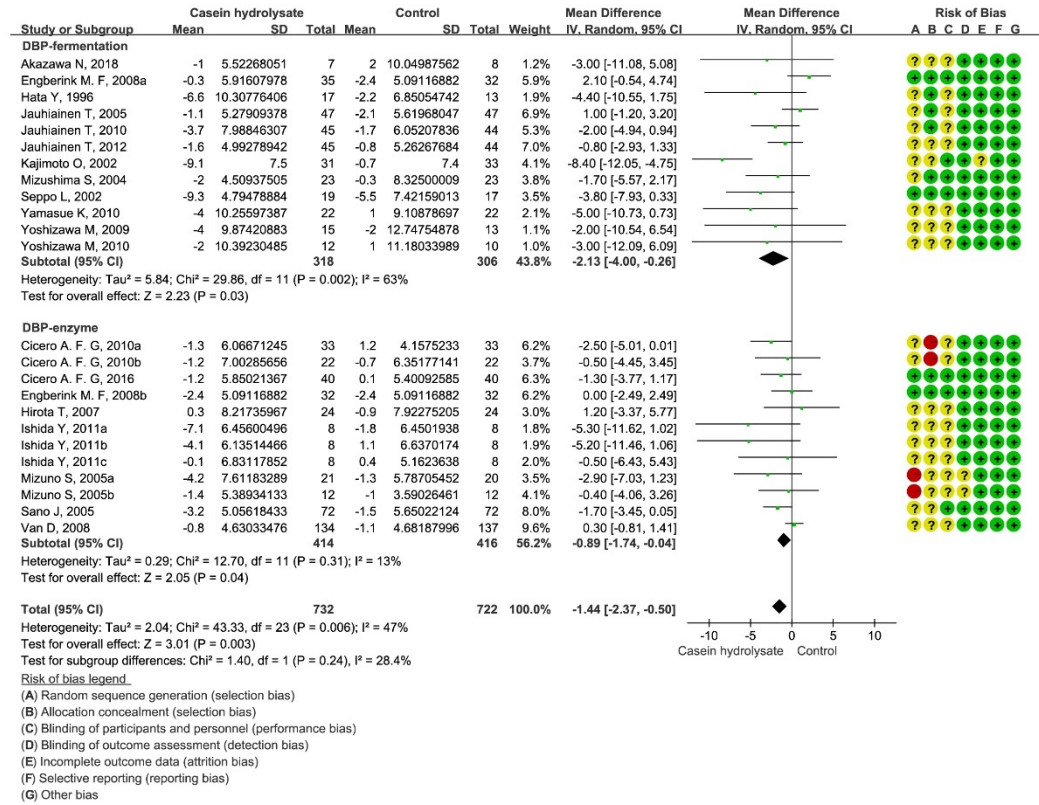

## B

### Fermentation

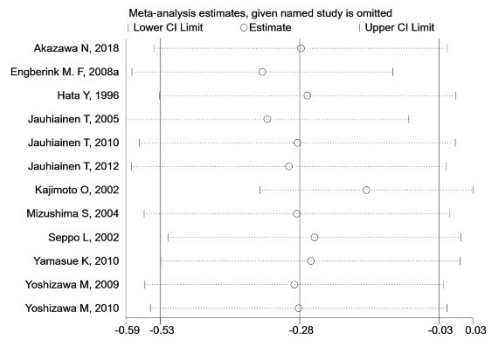

### Enzyme

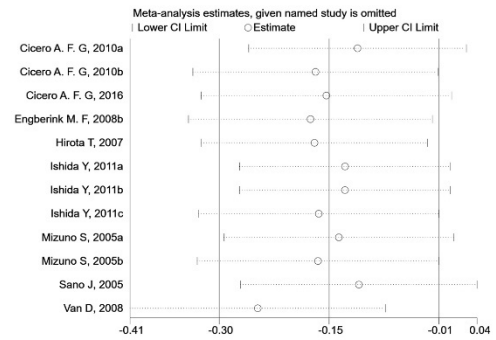

## C

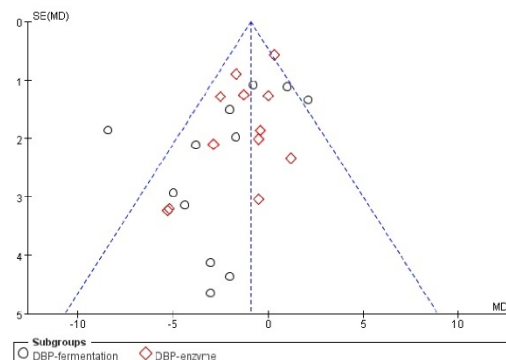

## A Disease

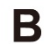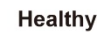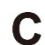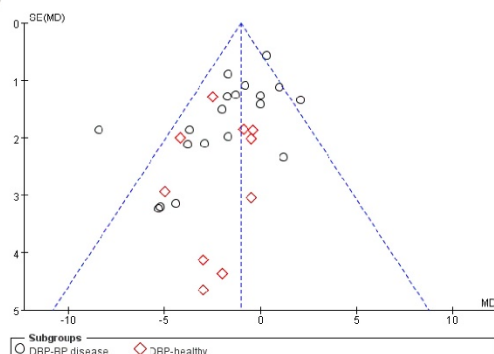

**Figure S12.** Forest plots (A), sensitivity analyses (B), and funnel plots (C) on DBP (mmHg) in the disease analysis. The results represented the changes of DBP in the disease subgroup with the casein hydrolysate intervention in comparison with the control diet.

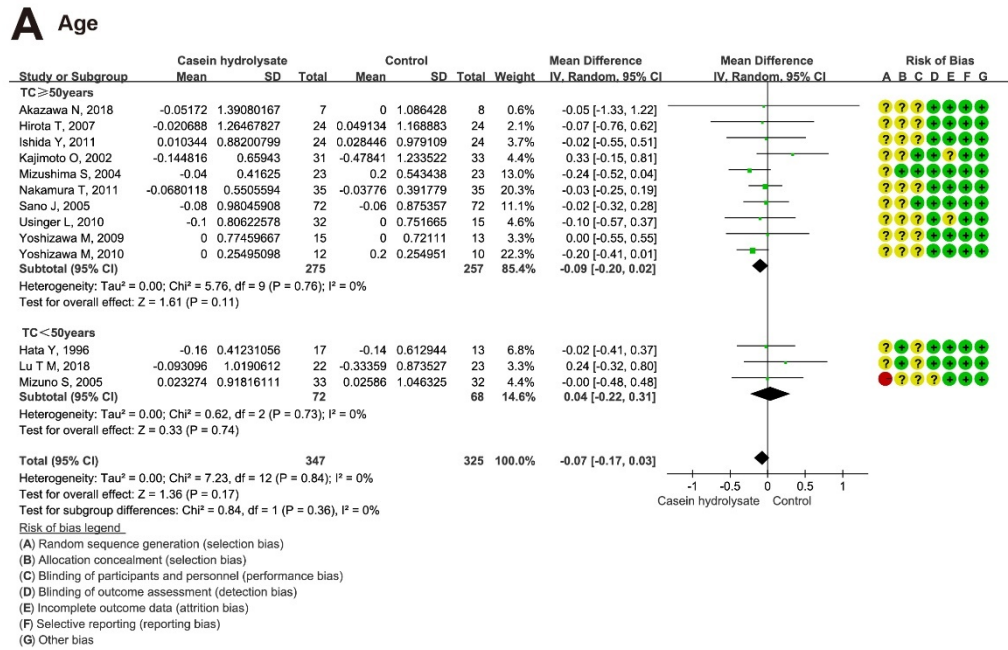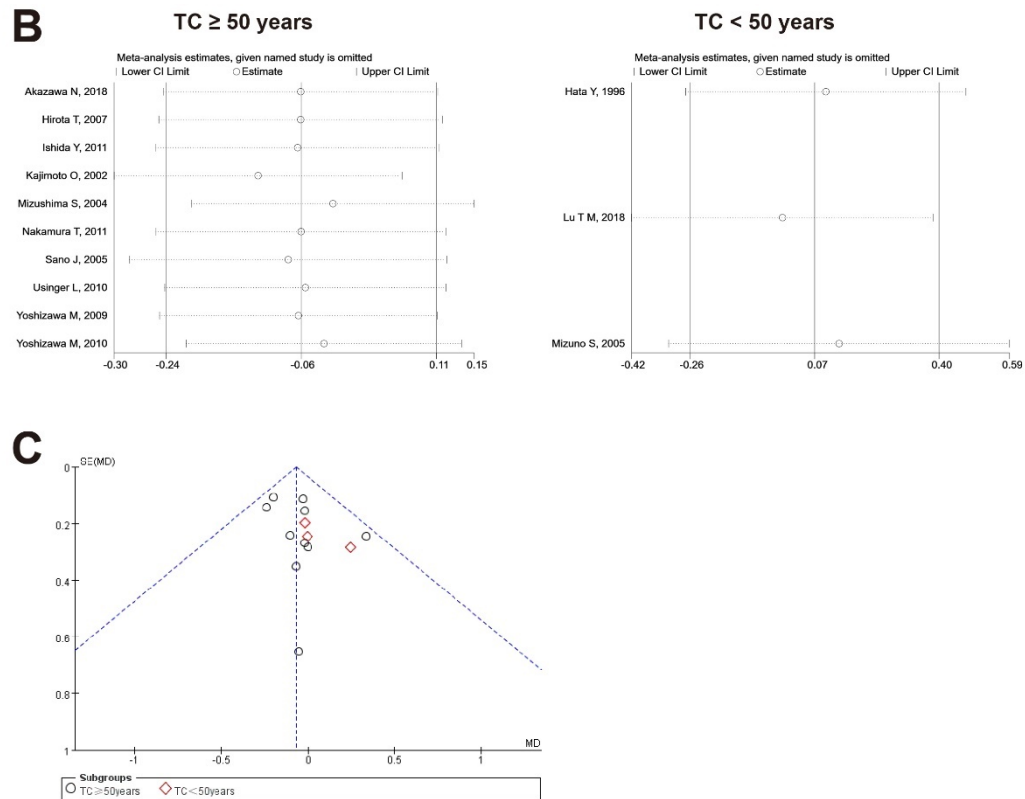

**Figure S13.** Forest plots (A), sensitivity analysis (B), and funnel plots (C) on TC (mmol/L) in the age analysis. The results represented the changes of TC in the age subgroup with the casein hydrolysate intervention in comparison with the control diet.

## A Duration

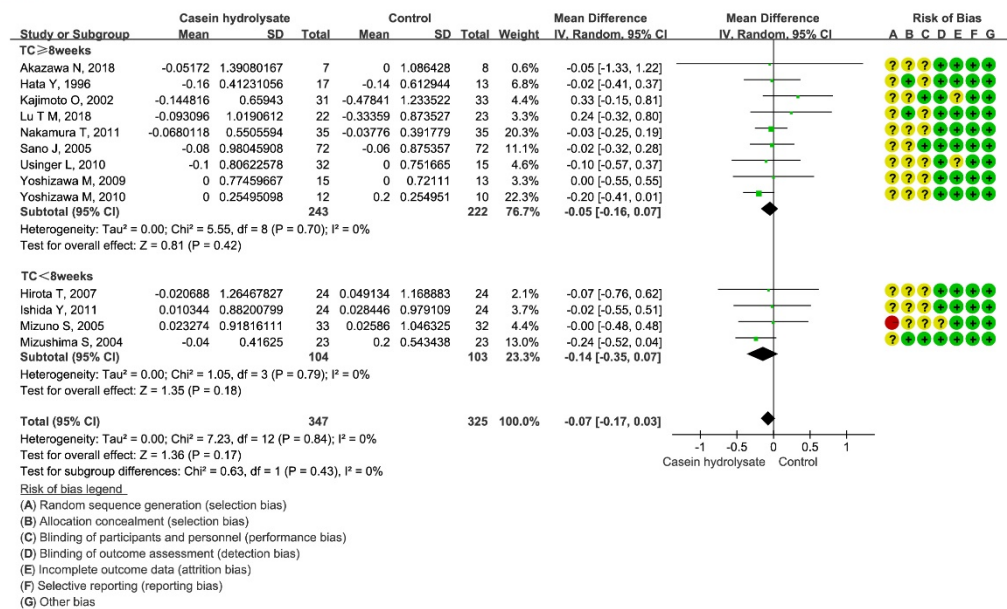

## B

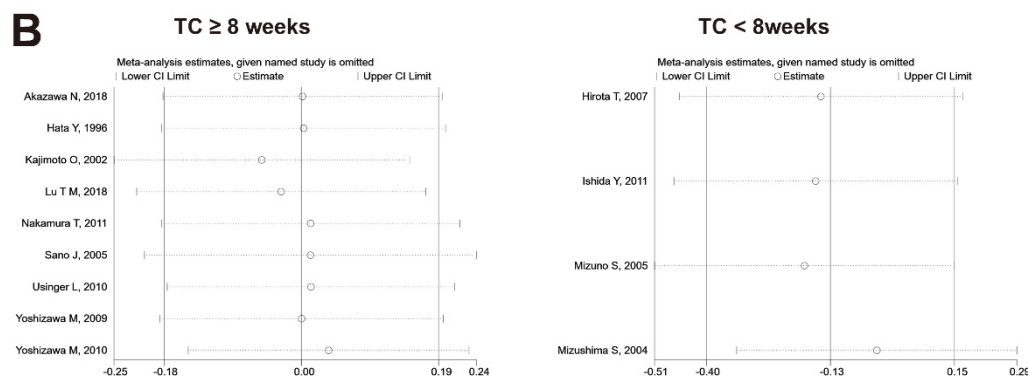

## C

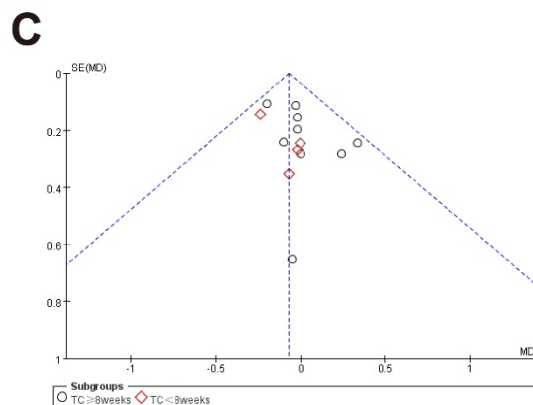

**Figure S14.** Forest plots (A), sensitivity analysis (B), and funnel plots (C) on TC (mmol/L) in the duration analysis. The results represented the changes of TC in the duration subgroup with the casein hydrolysate intervention in comparison with the control diet.

## A Preparation

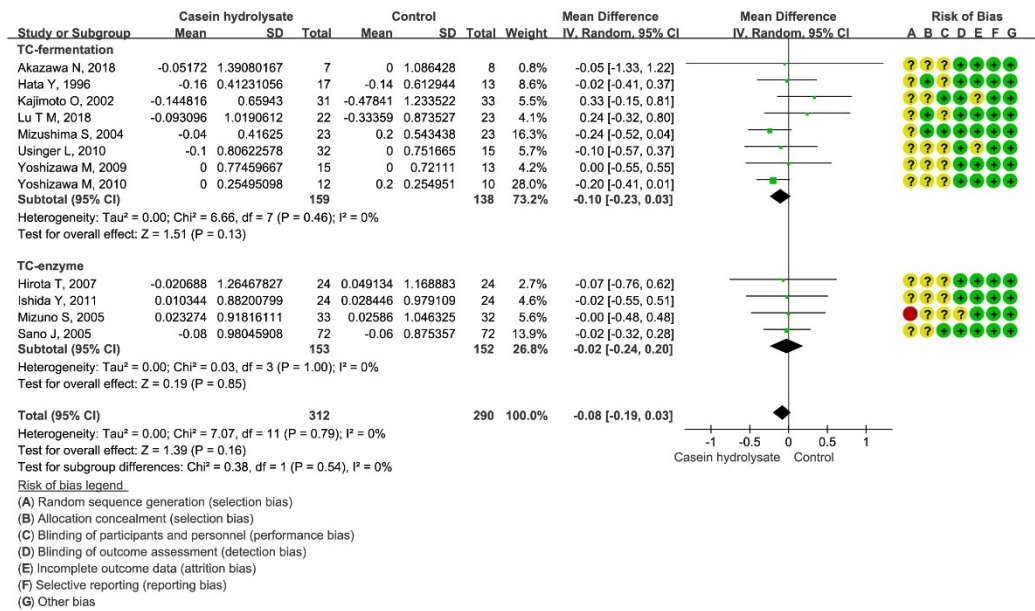

## B

### Fermentation

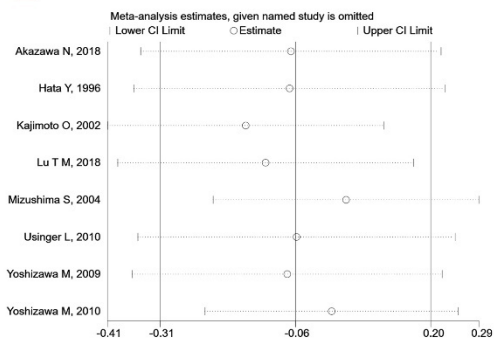

### Enzyme

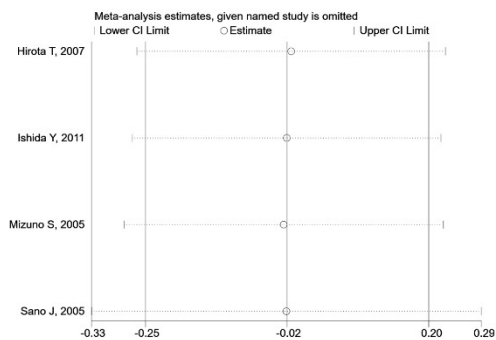

## C

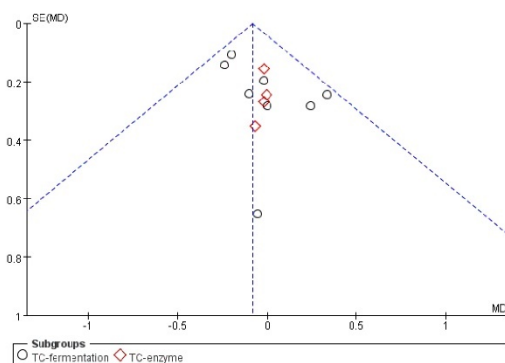

**Figure S15.** Forest plots (A), sensitivity analysis (B), and funnel plots (C) on TC (mmol/L) in the preparation analysis. The results represented the changes of TC in the preparation subgroup with the casein hydrolysate intervention in comparison with the control diet.

## A Disease

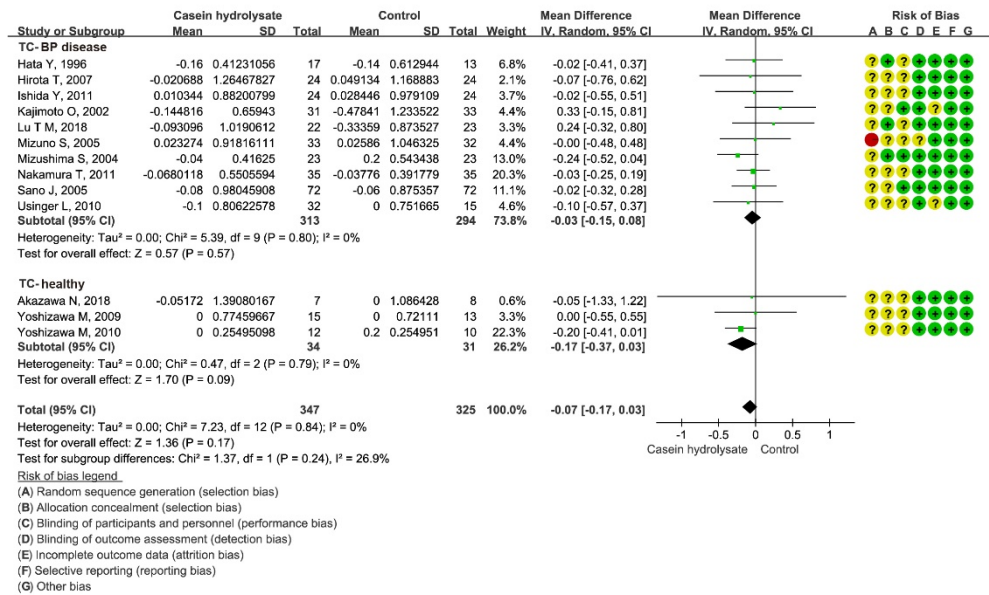

## B

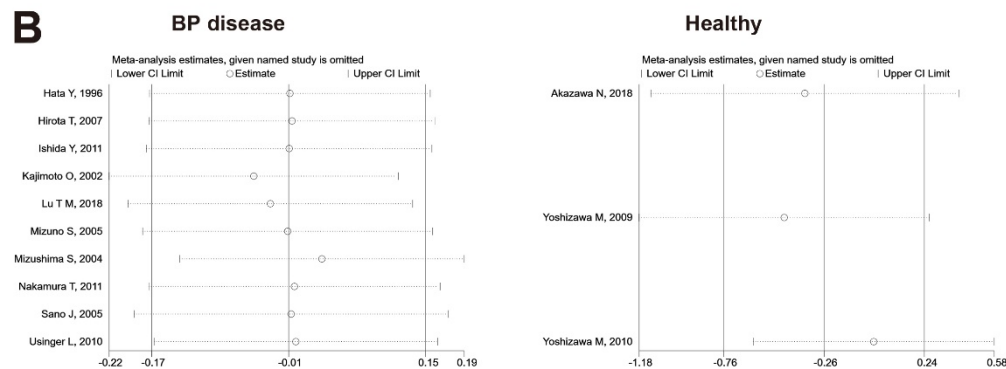

## C

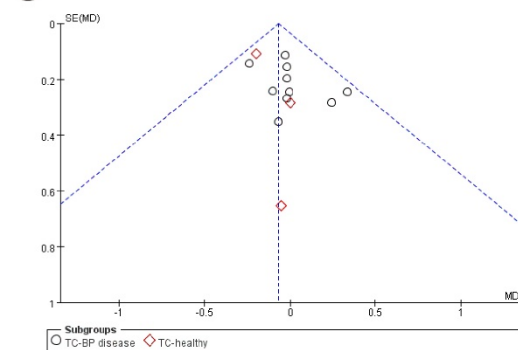

**Figure S16.** Forest plots (A), sensitivity analysis (B), and funnel plots (C) on TC (mmol/L) in the disease analysis. The results represented the changes of TC in the disease subgroup with the casein hydrolysate intervention in comparison with the control diet.

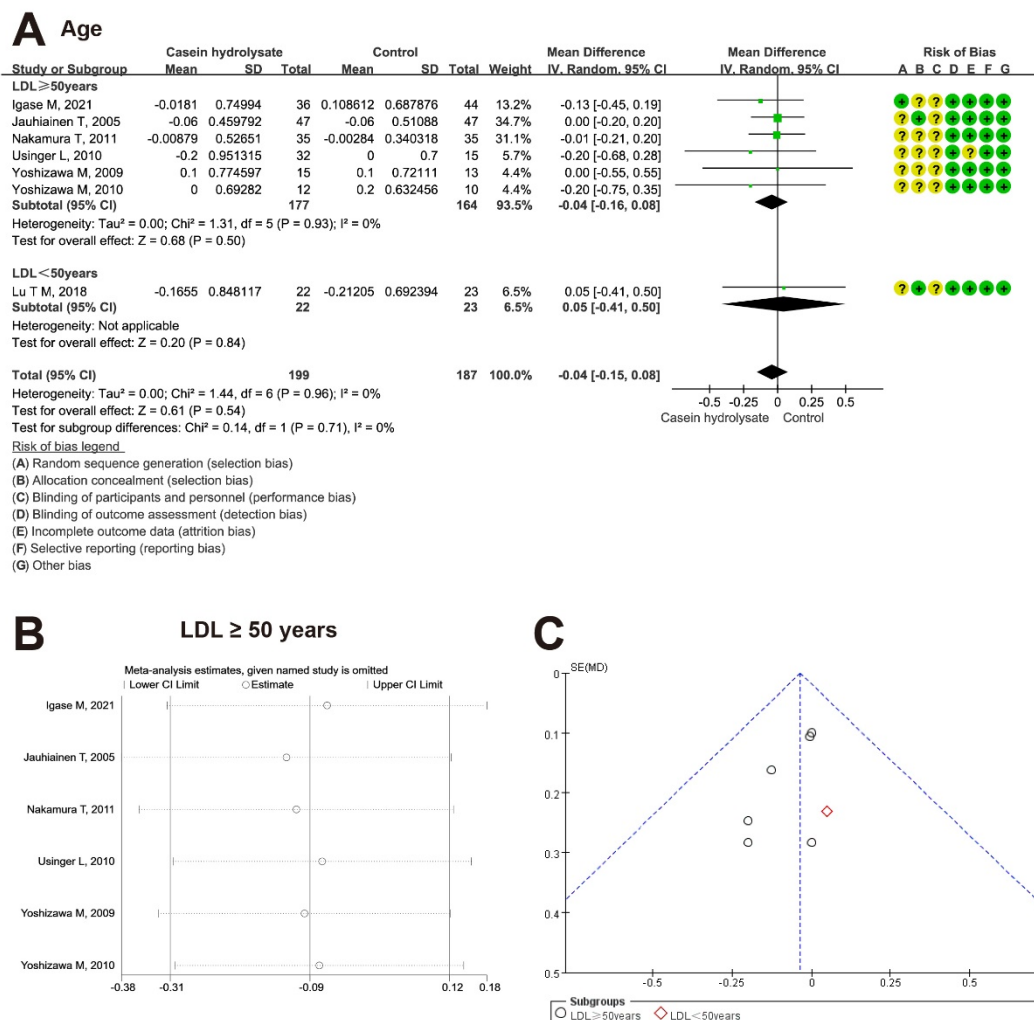

**Figure S17.** Forest plots (A), sensitivity analysis (B), and funnel plots (C) on LDL (mmol/L) in the age analysis. The results represented the changes of LDL in the age subgroup with the casein hydrolysate intervention in comparison with the control diet.

## A Disease

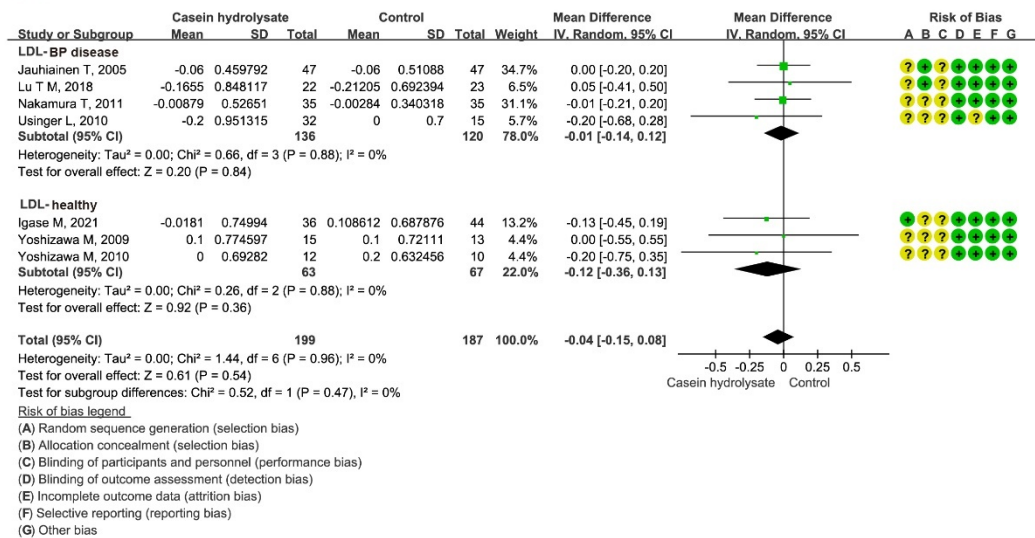

## B

### BP disease

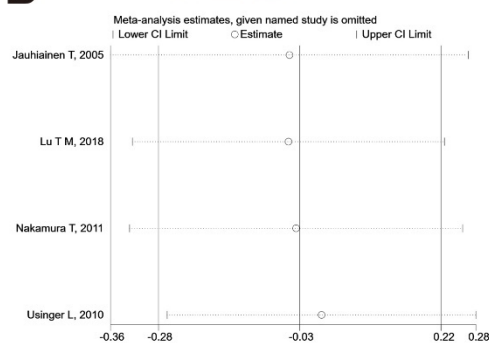

### Healthy

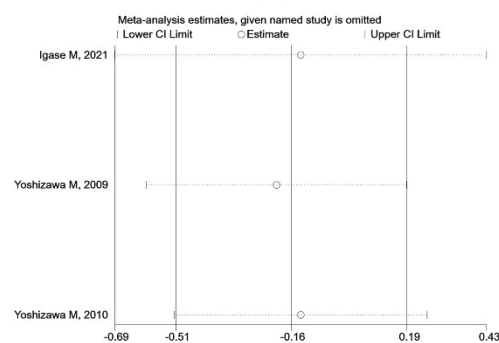

## C

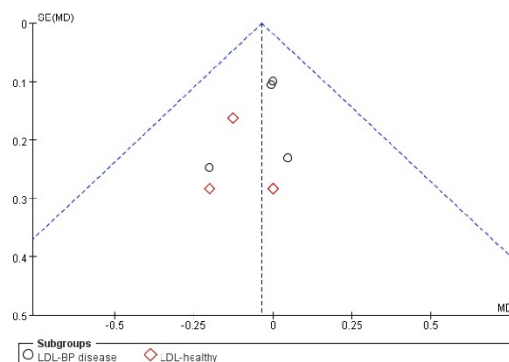

**Figure S18.** Forest plots (A), sensitivity analysis (B), and funnel plots (C) on LDL (mmol/L) in the disease analysis. The results represented the changes of LDL in the disease subgroup with the casein hydrolysate intervention in comparison with the control diet.

## A Age

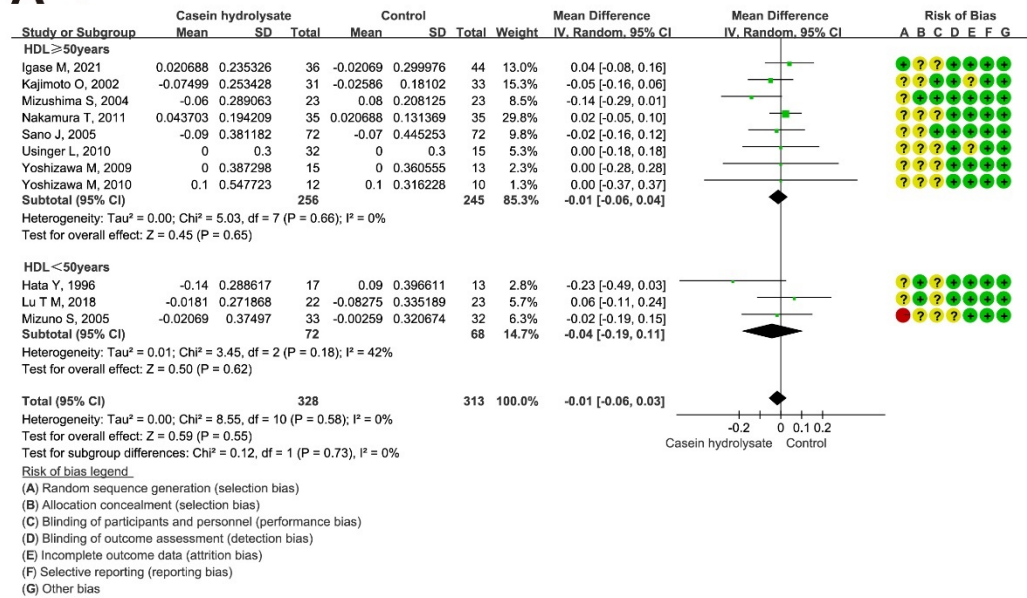

## B

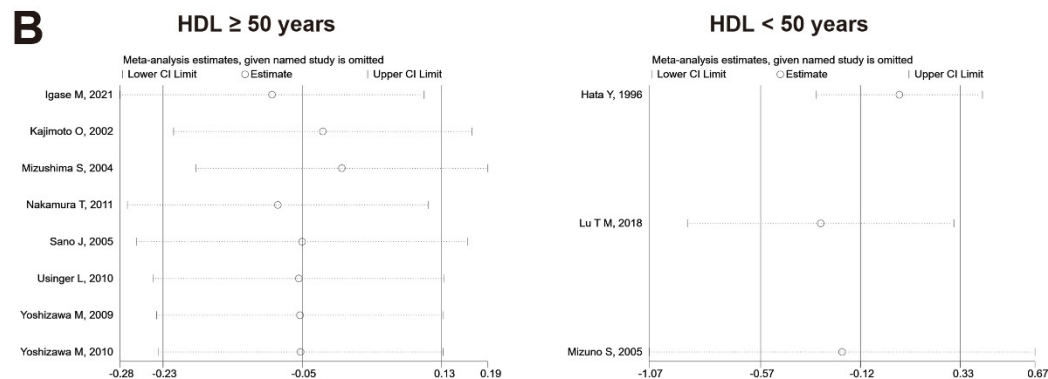

## C

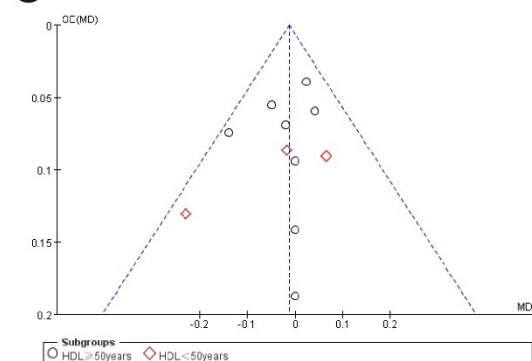

**Figure S19.** Forest plots (A), sensitivity analysis (B), and funnel plots (C) on HDL (mmol/L) in the age analysis. The results represented the changes of HDL in the age subgroup with the casein hydrolysate intervention in comparison with the control diet.

## A Duration

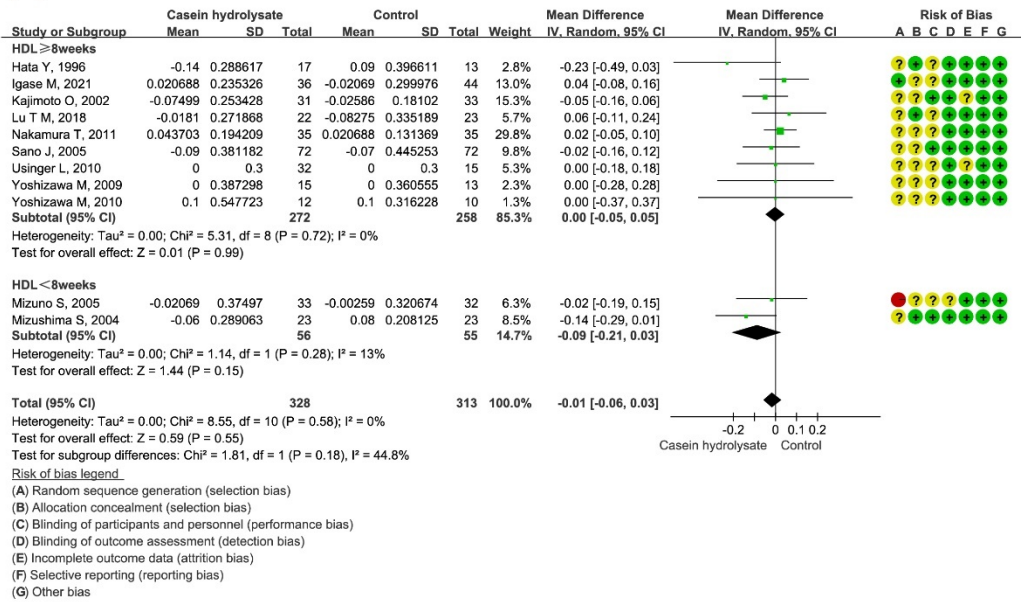

## B

### HDL ≥ 8 weeks

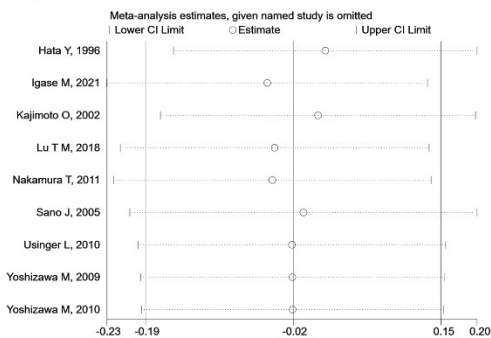

### HDL < 8 weeks

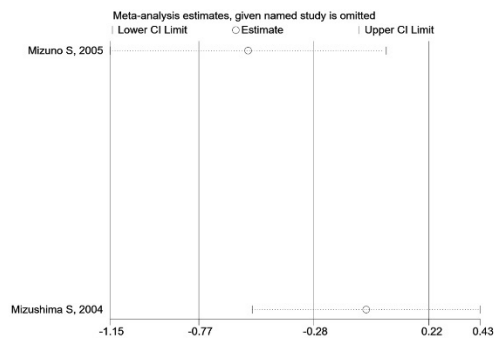

## C

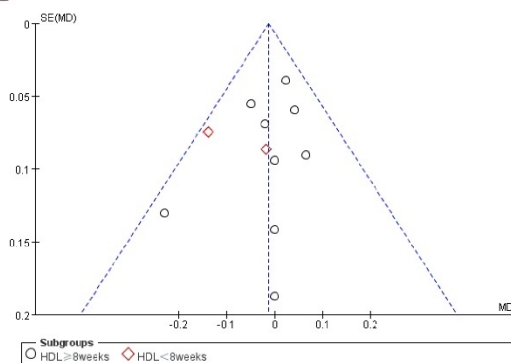

**Figure S20.** Forest plots (A), sensitivity analysis (B), and funnel plots (C) on HDL (mmol/L) in the duration analysis. The results represented the changes of HDL in the duration subgroup with the casein hydrolysate intervention in comparison with the control diet.

## A Preparation

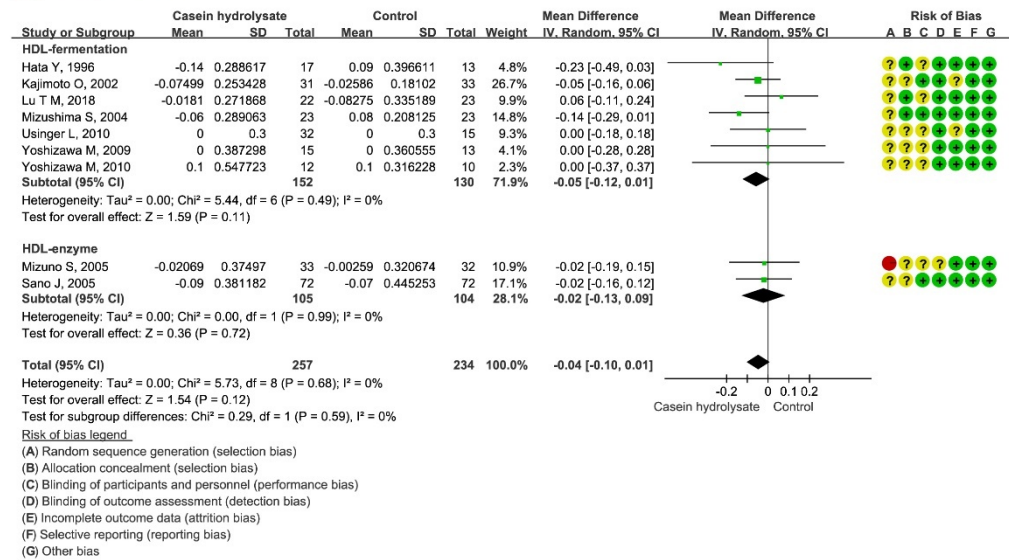

## B Fermentation

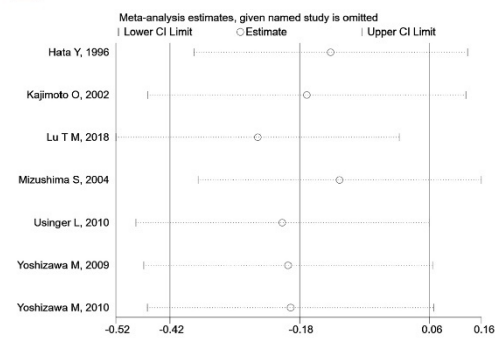

## Enzyme

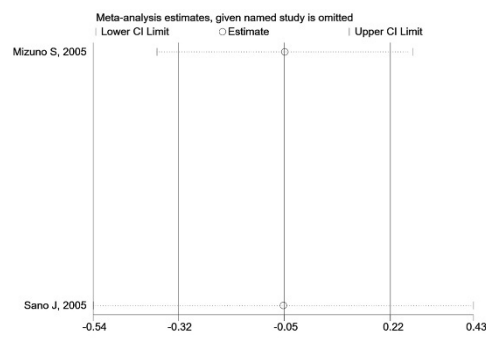

## C

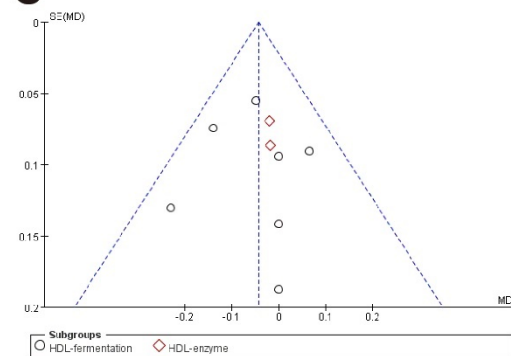

**Figure S21.** Forest plots (A), sensitivity analysis (B), and funnel plots (C) on HDL (mmol/L) in the preparation analysis. The results represented the changes of HDL in the preparation subgroup with the casein hydrolysate intervention in comparison with the control diet.

## A Disease

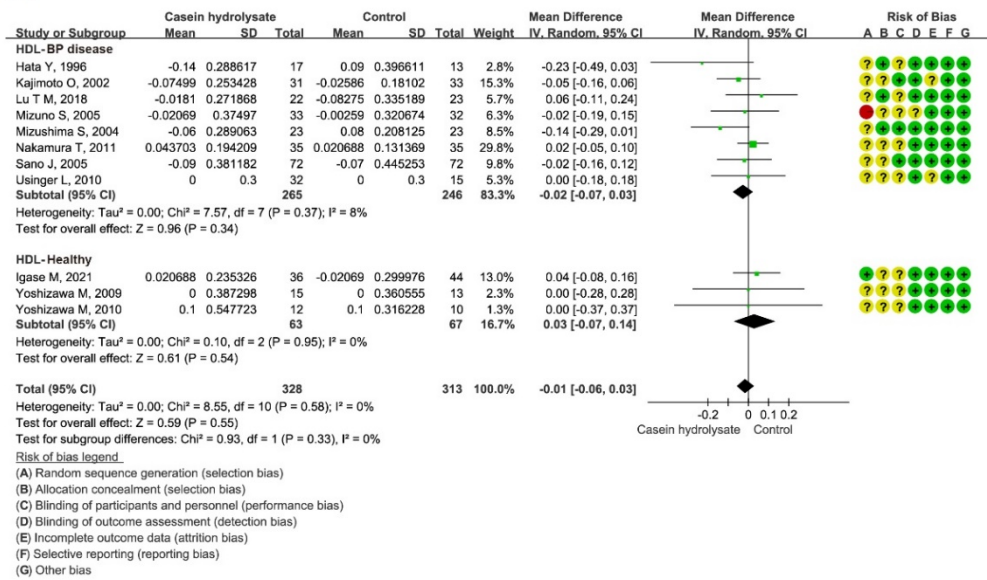

## B

### BP disease

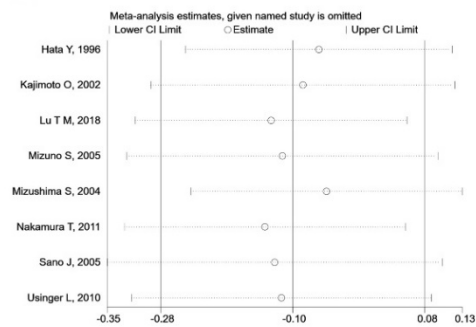

### Healthy

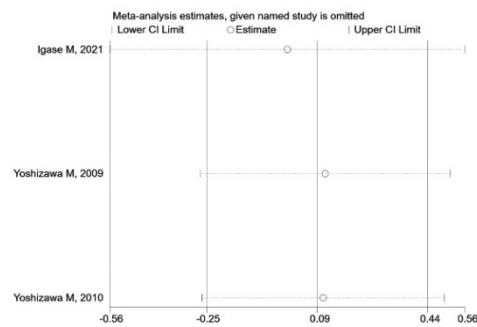

## C

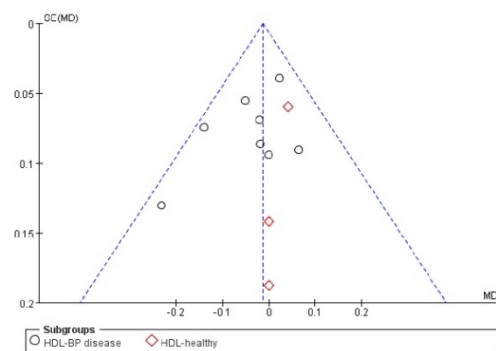

**Figure S22.** Forest plots (A), sensitivity analysis (B), and funnel plots (C) on HDL (mmol/L) in the disease analysis. The results represented the changes of HDL in the disease subgroup with the casein hydrolysate intervention in comparison with the control diet.

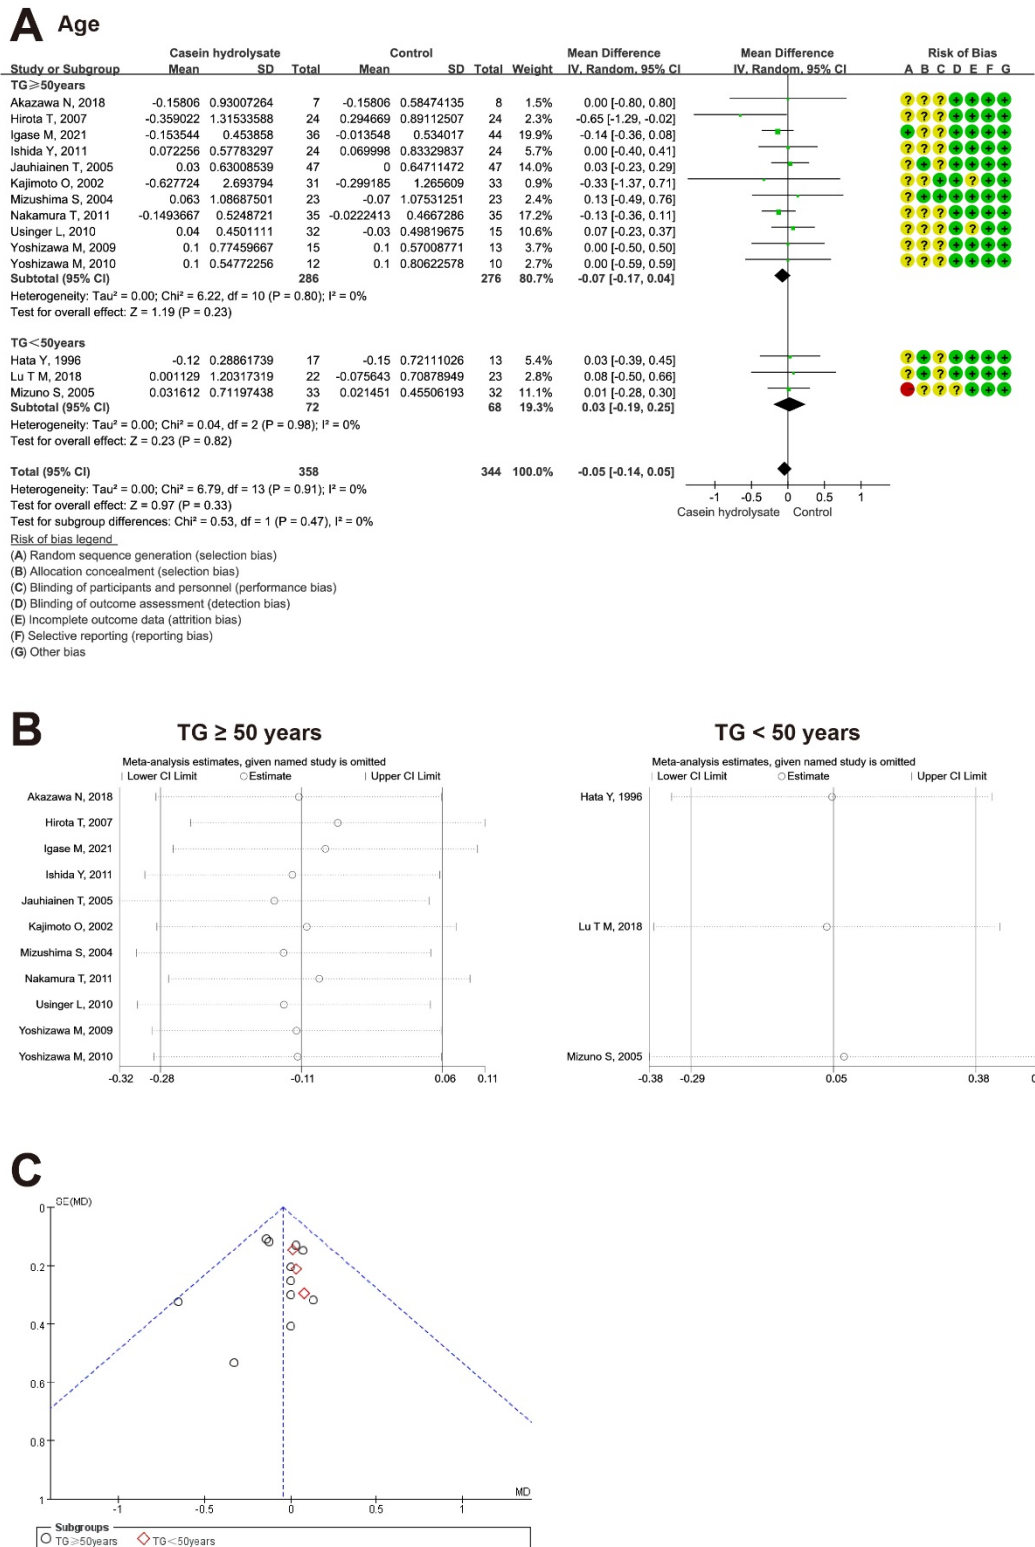

**Figure S23.** Forest plots (A), sensitivity analysis (B), and funnel plots (C) on TG (mmol/L) in the age analysis. The results represented the changes of TG in the age subgroup with the casein hydrolysate intervention in comparison with the control diet.

## A Duration

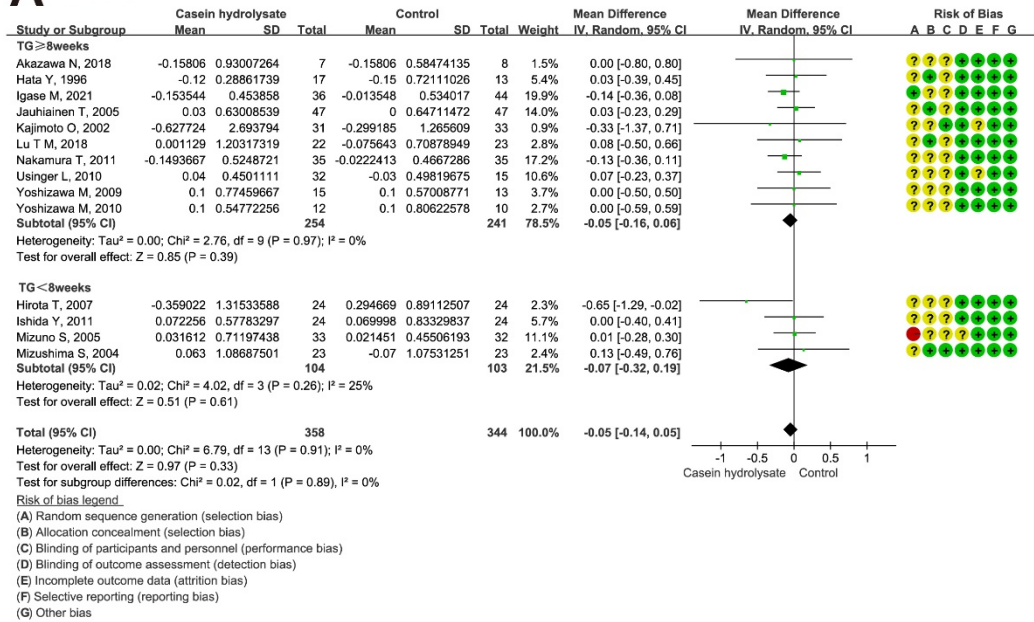

## B

### TG ≥ 8weeks

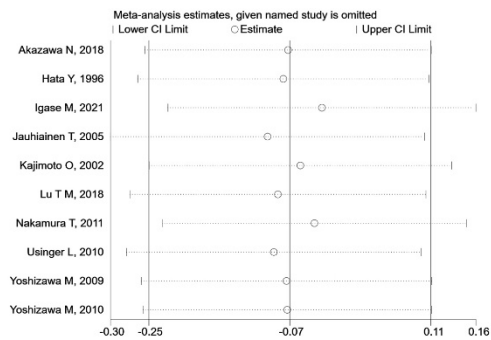

### TG < 8weeks

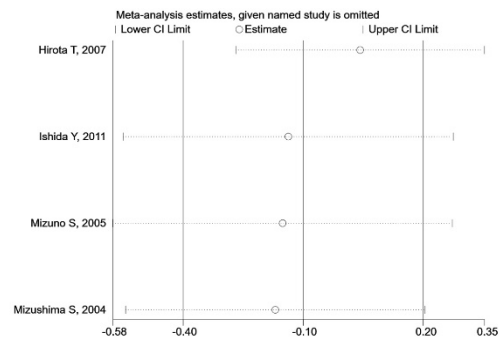

## C

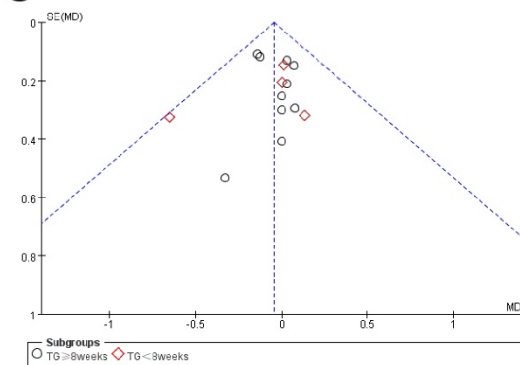

**Figure S24.** Forest plots (A), sensitivity analysis (B), and funnel plots (C) on TG (mmol/L) in the duration analysis. The results represented the changes of TG in the duration subgroup with the casein hydrolysate intervention in comparison with the control diet.

## A Preparation

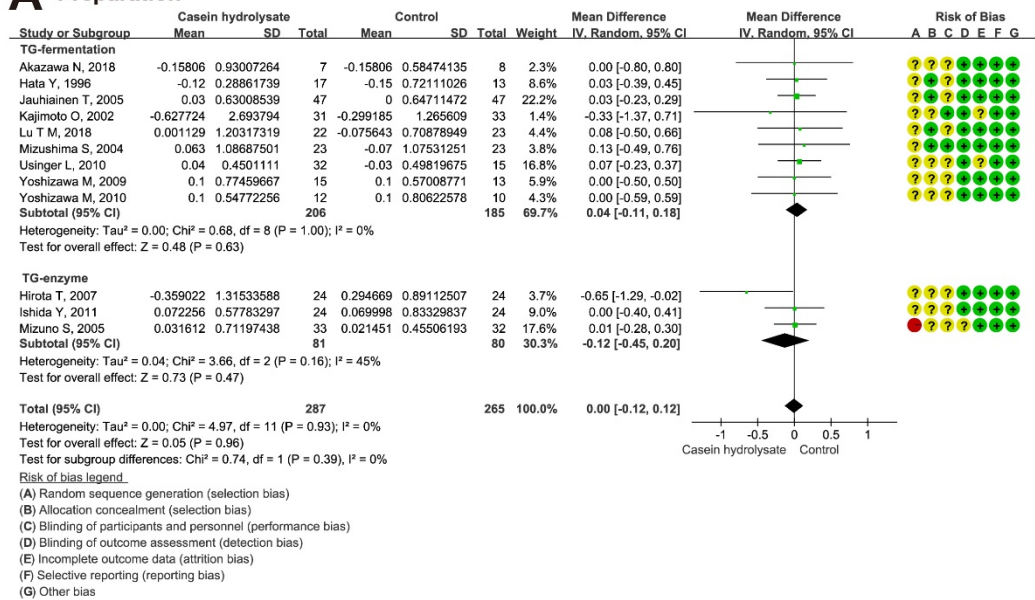

## B

### Fermentation

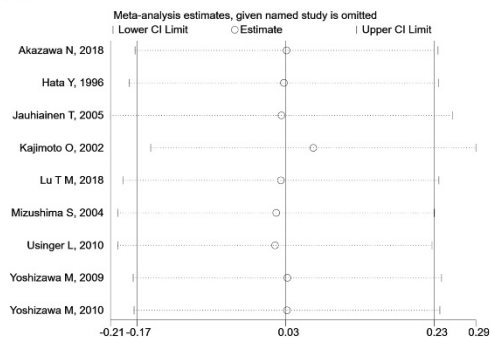

### Enzyme

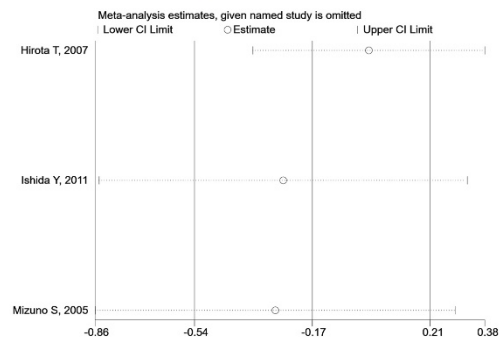

## C

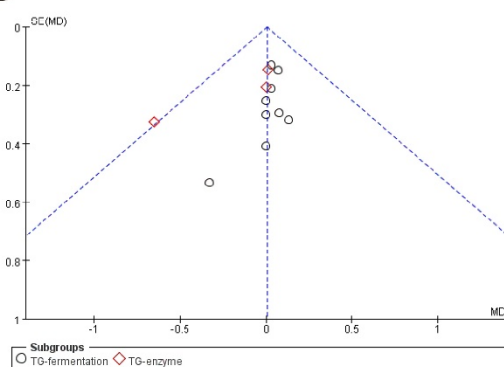

**Figure S25.** Forest plots (A), sensitivity analysis (B), and funnel plots (C) on TG (mmol/L) in the preparation analysis. The results represented the changes of TG in the preparation subgroup with the casein hydrolysate intervention in comparison with the control diet.

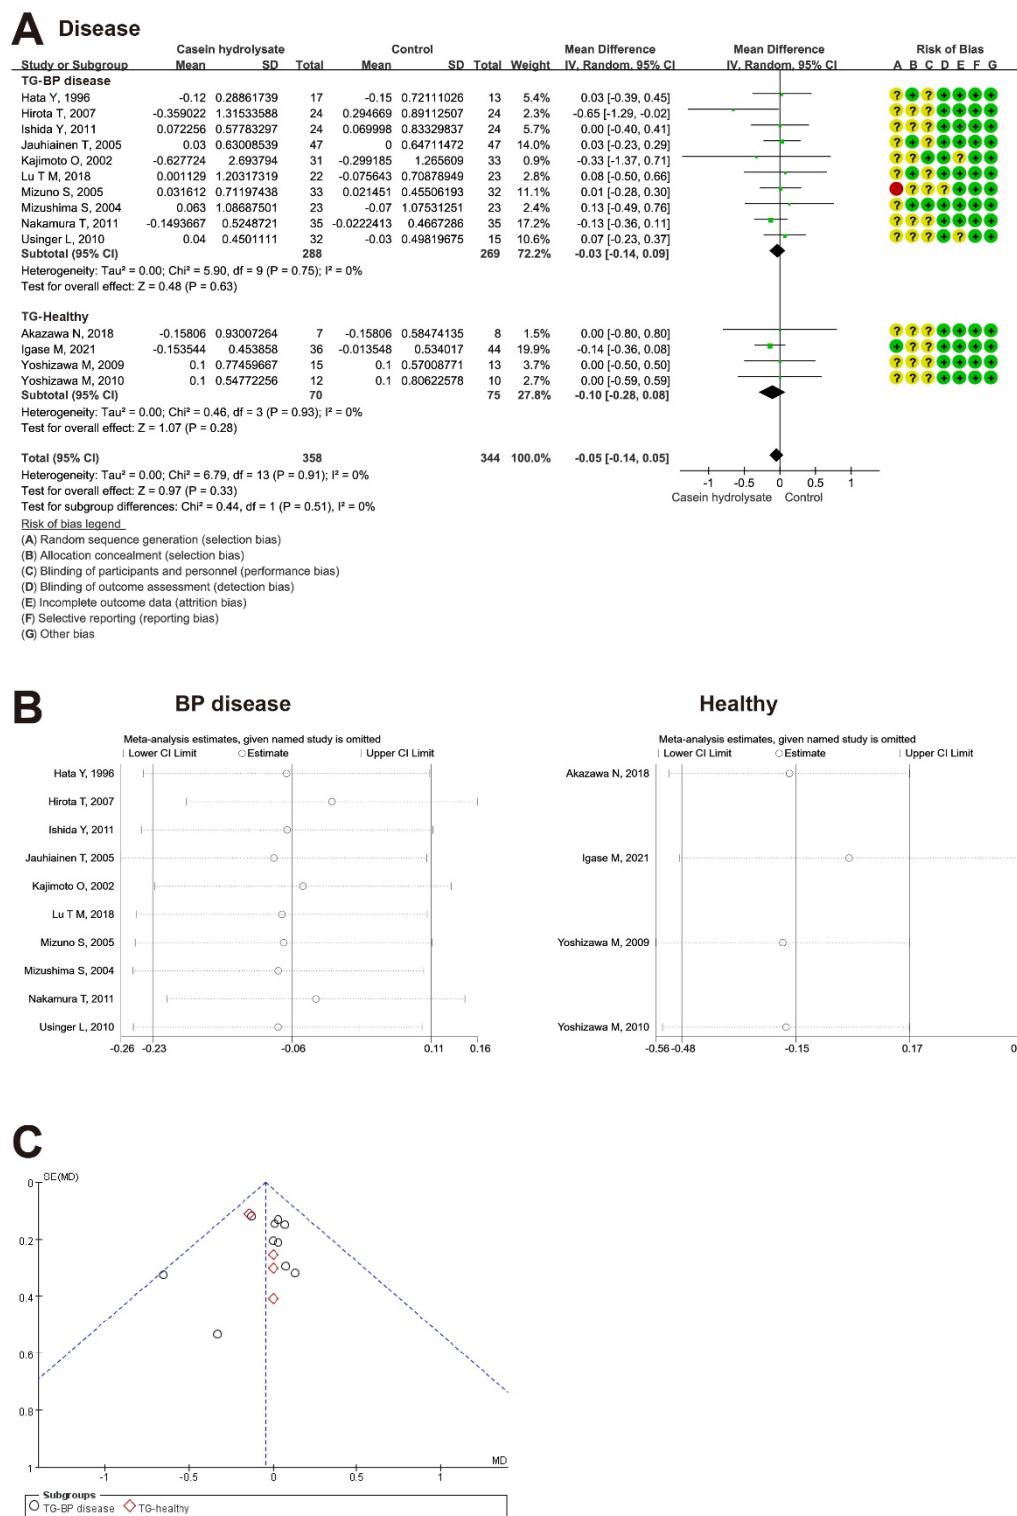

**Figure S26.** Forest plots (A), sensitivity analysis (B), and funnel plots (C) on TG (mmol/L) in the disease analysis. The results represented the changes of TG in the disease subgroup with the casein hydrolysate intervention in comparison with the control diet.

## A Age

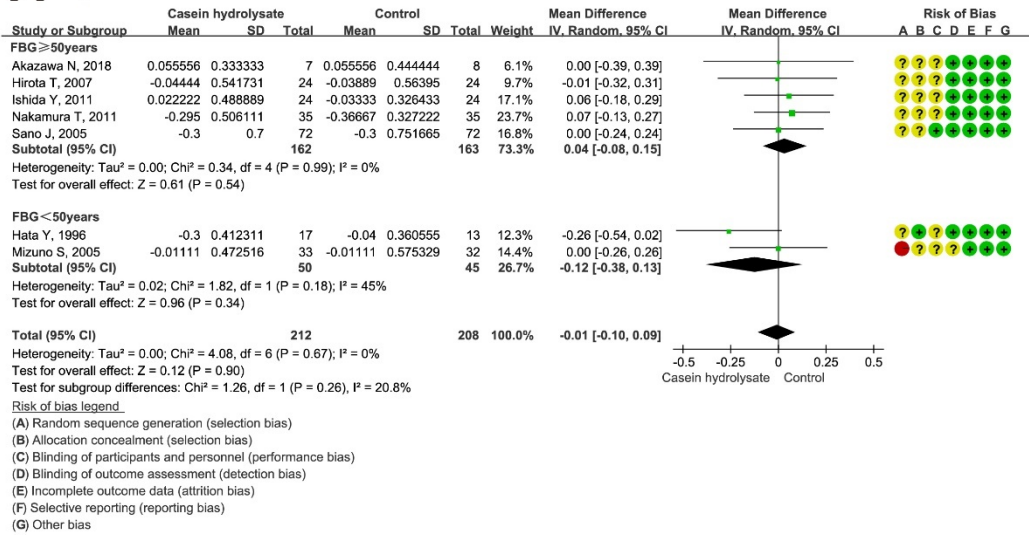

## B

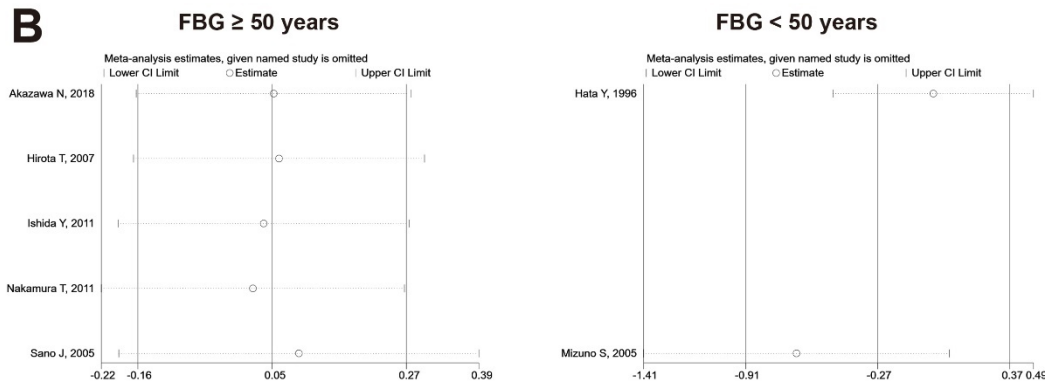

## C

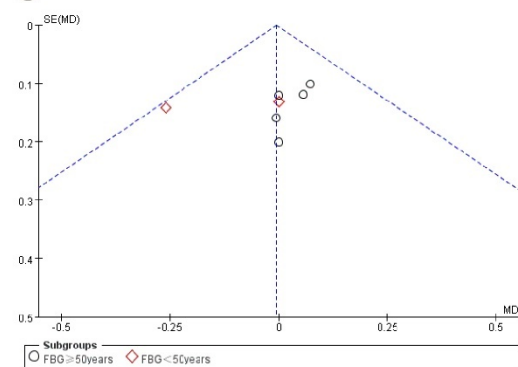

**Figure S27.** Forest plots (A), sensitivity analysis (B), and funnel plots (C) on FBG (mmol/L) in the age analysis. The results represented the changes of FBG in the age subgroup with the casein hydrolysate intervention in comparison with the control diet.

## A Duration

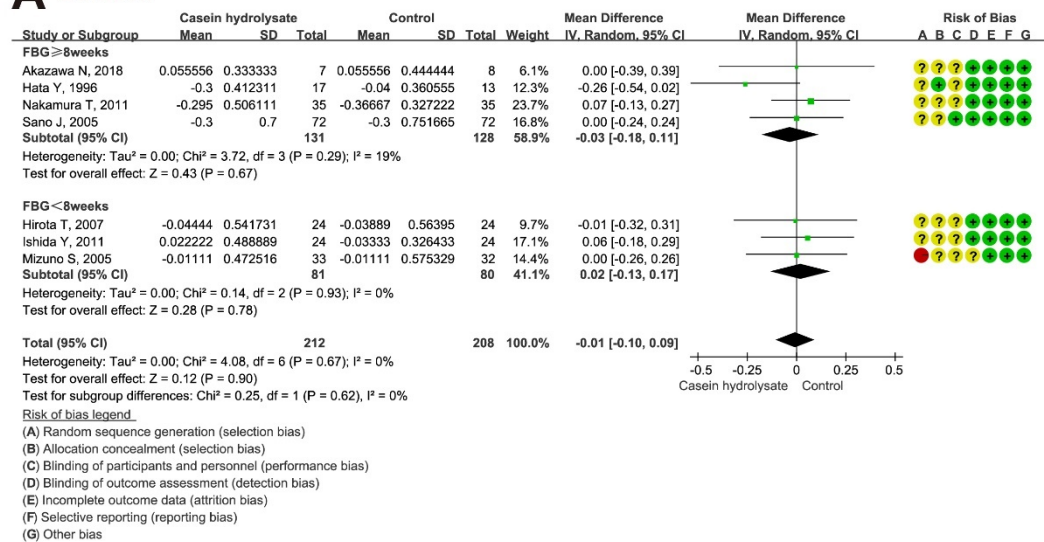

## B

### FBG ≥ 8 weeks

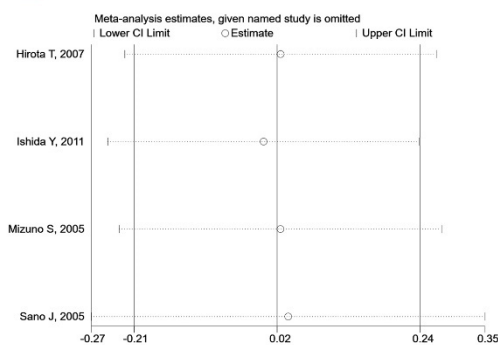

### FBG < 8 weeks

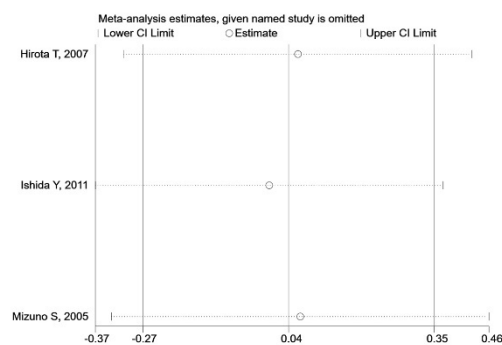

## C

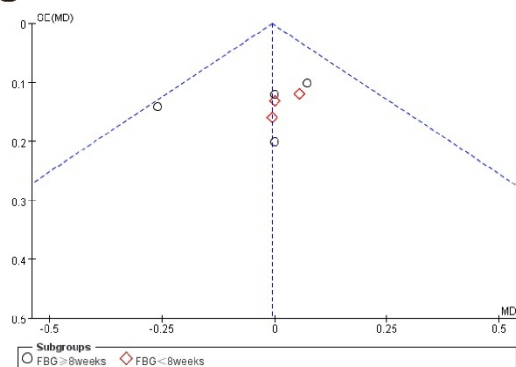

**Figure S28.** Forest plots (A), sensitivity analysis (B), and funnel plots (C) on FBG (mmol/L) in the duration analysis. The results represented the changes of FBG in the duration subgroup with the casein hydrolysate intervention in comparison with the control diet.

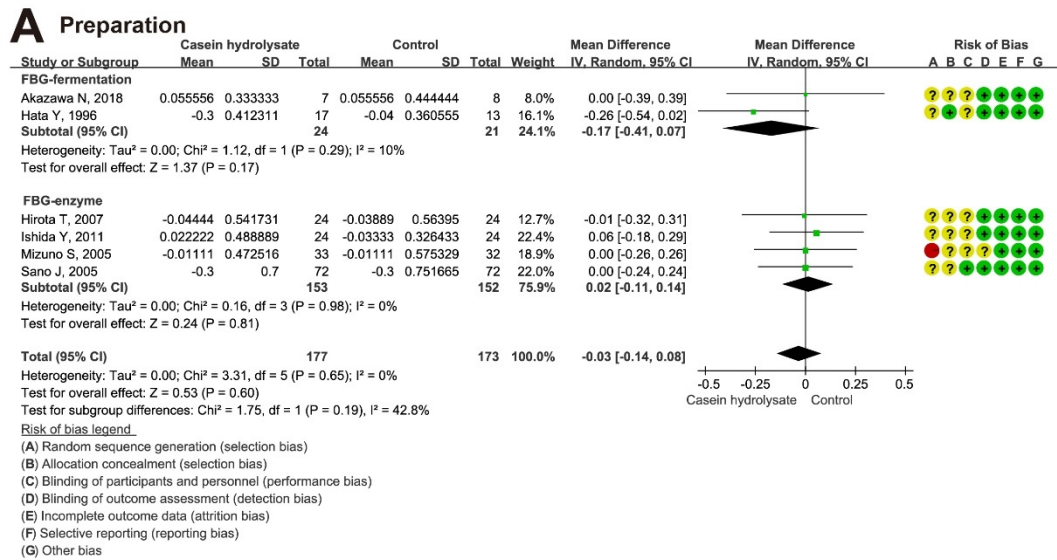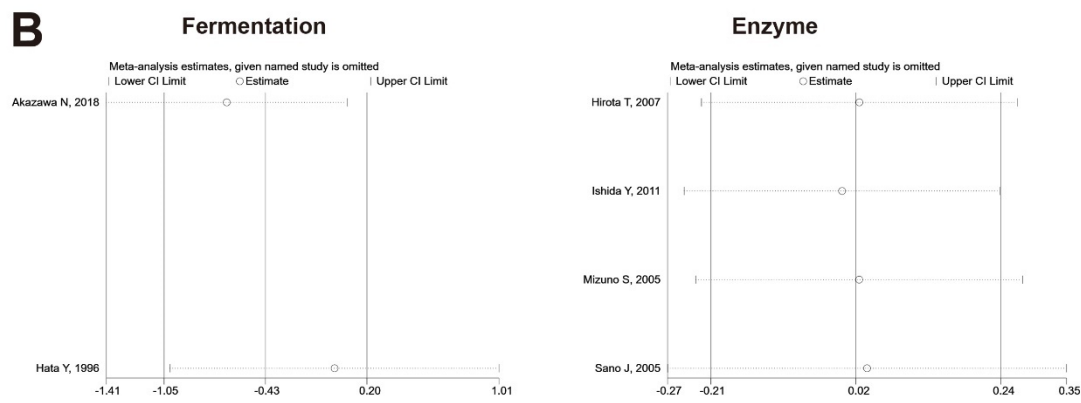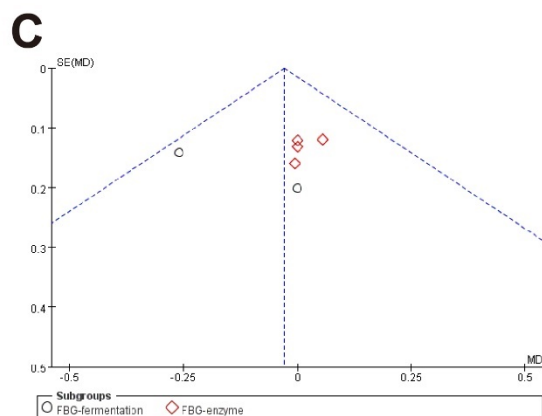

**Figure S29.** Forest plots (A), sensitivity analysis (B), and funnel plots (C) on FBG (mmol/L) in the preparation analysis. The results represented the changes of FBG in the preparation subgroup with the casein hydrolysate intervention in comparison with the control diet.

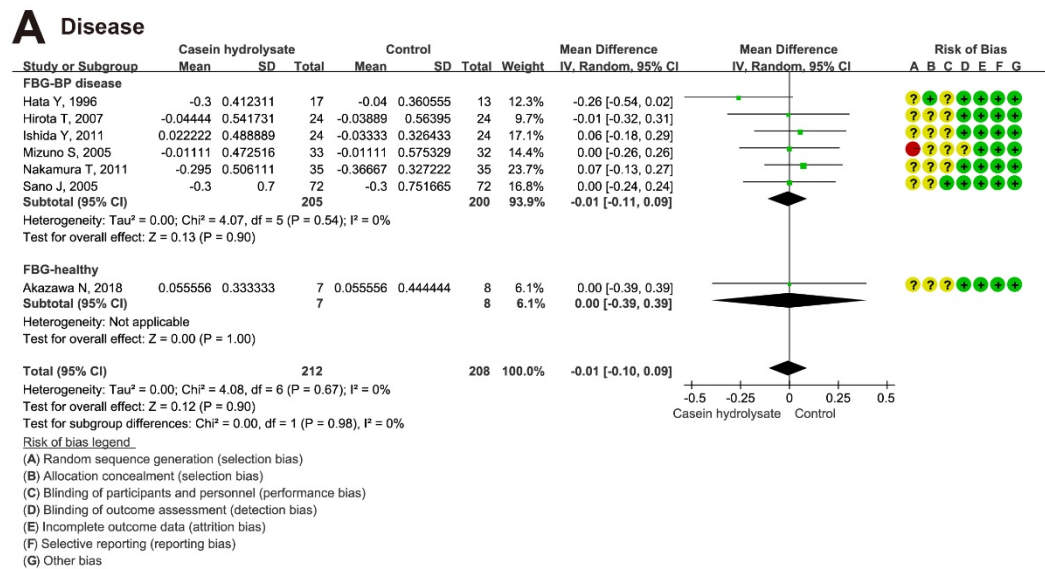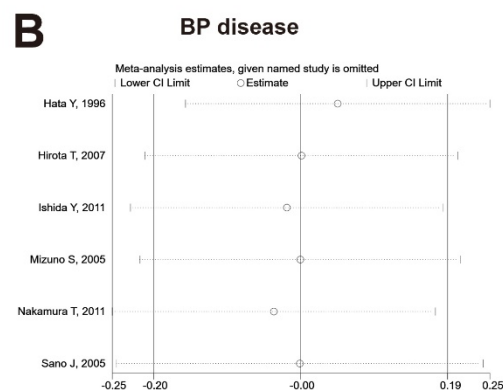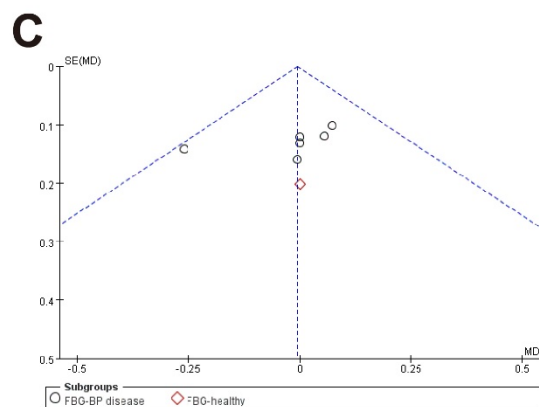

**Figure S30.** Forest plots (A), sensitivity analysis (B), and funnel plots (C) on FBG (mmol/L) in the disease analysis. The results represented the changes of FBG in the disease subgroup with the casein hydrolysate intervention in comparison with the control diet.
